1 CHD8 Regulates Cellular Homeostasis and Neuronal Function Genes  
2 Across Multiple Models of *CHD8* Haploinsufficiency

3

4

A. Ayanna Wade<sup>1,2</sup>, Kenneth Lim<sup>1,2</sup>, Rinaldo Catta-Preta<sup>1,2</sup>, Alex S. Nord<sup>1,2,\*</sup>

5

6 <sup>1</sup>Department of Psychiatry and Behavioral Sciences, University of California, Davis, Davis, CA,

7 USA. <sup>2</sup>Department of Neurobiology, Physiology and Behavior, University of California, Davis,

8 Davis, CA, USA.

9

10 \*Correspondence:

11 Dr. Alex Nord

12 [asnord@ucdavis.edu](mailto:asnord@ucdavis.edu)

13

14 Word count: 5,132

15 Figure count: 15

16 **ABSTRACT**

17

18 The packaging of DNA into chromatin determines the transcriptional potential of cells and is  
19 central to eukaryotic gene regulation. Recent sequencing of patient mutations has linked *de novo*  
20 loss-of-function mutations to chromatin remodeling factors with specific, causal roles in  
21 neurodevelopmental disorders. Characterizing cellular and molecular phenotypes arising from  
22 haploinsufficiency of chromatin remodeling factors could reveal convergent mechanisms of  
23 pathology. Chromodomain helicase DNA binding protein 8 (*CHD8*) encodes a chromatin  
24 remodeling factor gene and has among the highest *de novo* loss-of-function mutations rates in  
25 patients with autism spectrum disorder (ASD). Mutations to *CHD8* are expected to drive  
26 neurodevelopmental pathology through global disruptions to gene expression and chromatin  
27 state, however, mechanisms associated with CHD8 function have yet to be fully elucidated. We  
28 analyzed published transcriptomic and epigenomic data across *CHD8 in vitro* and *in vivo*  
29 knockdown and knockout models to identify convergent mechanisms of gene regulation by  
30 CHD8. We found reproducible high-affinity interactions of CHD8 near promoters of genes  
31 necessary for basic cell functions and gene regulation, especially chromatin organization and  
32 RNA processing genes. Overlap between CHD8 interaction and differential expression suggests  
33 that reduced dosage of *CHD8* directly relates to decreased expression of these genes. In addition,  
34 genes important for neuronal development and function showed consistent dysregulation, though  
35 there was a reduced rate and decreased affinity for CHD8 interactions near these genes. This  
36 meta-analysis verifies CHD8 as a critical regulator of gene expression and reveals a consistent  
37 set of high affinity CHD8 interaction targets observed across human and mouse *in vivo* and *in*  
38 *vitro* studies. Our findings highlight novel core functions of CHD8 and indicate direct and  
39 downstream gene regulatory impacts that are likely to be associated with neuropathology  
40 underlying CHD8-associated neurodevelopmental disorder.

41

42 Keywords: Autism spectrum disorder; CHD8; Chromatin remodeling; Functional genomics;  
43 Neurodevelopment

## 44 INTRODUCTION

45

46 Recent genetic studies suggest that single copy loss-of-function mutations to chromatin  
47 remodeling genes significantly contribute to autism spectrum disorder (ASD) neurobiology,  
48 presumably through disruptions to transcriptional regulation in the developing and mature brain  
49 (De Rubeis et al. 2014, Iossifov et al. 2014, Parikshak et al. 2013, O’Roak et al. 2012a, O’Roak  
50 et al. 2012b, Sanders et al. 2015, Vissers et al. 2016). The gene encoding chromodomain helicase  
51 DNA binding protein 8 (*CHD8*) has one of the highest observed mutation rates in sporadic ASD  
52 (O’Roak et al. 2012a, Barnard et al. 2015, Krumm et al. 2014), and mutations to *CHD8* have also  
53 been identified in cases from schizophrenia and intellectual disability cohorts (Tatton-Brown et  
54 al. 2017, McCarthy et al. 2014). Patients that carry *CHD8* mutations typically meet stringent  
55 qualifications for ASD diagnosis, and frequently present with comorbid features including  
56 macrocephaly, cognitive impairment, distinct craniofacial morphology, and gastrointestinal  
57 disturbances (Bernier et al. 2014). Knockdown or haploinsufficiency of *Chd8* in animal models  
58 has recapitulated specific neuroanatomical, gastrointestinal, cognitive, and behavioral  
59 phenotypes observed in patients (Sugathan et al. 2014, Gompers et al. 2017, Katayama et al.  
60 2016, Platt et al. 2017), though reported phenotypes vary across models. Considering the  
61 relevance of *CHD8* mutations in neurodevelopmental disorders and the positive findings of  
62 relevant phenotypes in model systems, characterizing the convergent patterns of *CHD8* genomic  
63 interactions and transcriptional outcomes caused by *CHD8* haploinsufficiency across studies  
64 could significantly advance understanding of core pathophysiology in patients carrying *CHD8*  
65 mutations and, potentially, reveal generalized chromatin-associated cellular mechanisms  
66 underlying neurodevelopmental disorders.

67

68 *CHD8* belongs to a family of ATP-dependent chromatin remodelers (Hall and Georgel  
69 2007, Marfella and Imbalzano 2007, Hargreaves and Crabtree 2011). CHD family proteins are  
70 distinguished by tandem chromodomains predicted to enable these proteins to bind histones  
71 (Flanagan et al. 2005). As some CHD proteins demonstrate chromatin remodeling activity (Hall  
72 and Georgel 2007, McKnight et al. 2011, Tong et al. 1998), *CHD8* has been speculated to drive  
73 ASD-associated changes in neurodevelopmental gene expression by targeting and remodeling  
74 chromatin at specific promoters and enhancers (Sugathan et al. 2014, Cotney et al. 2015,  
75 Ceballos-Chavez et al. 2015). This is supported by evidence that *CHD8* can reposition  
76 nucleosomes *in vitro* and in mammalian cell culture (Thompson et al. 2008), and that loss of  
77 *Chd8* in *in vitro* and *in vivo* models dysregulates ASD-associated and *Chd8*-target gene  
78 expression (Sugathan et al. 2014, Gompers et al. 2017, Katayama et al. 2016, Cotney et al.  
79 2015). Several mechanisms have been suggested to underlie *CHD8* binding specificity, including  
80 targeting through histone modifications associated with open chromatin (Sugathan et al. 2014,  
81 Cotney et al. 2015, Yuan et al. 2007, Rodriguez-Paredes et al. 2009) and recruitment through  
82 protein-protein interactions (Thompson et al. 2008, Yuan et al. 2007, Rodriguez-Paredes et al.  
83 2009, Ishihara et al. 2006, Nishiyama et al. 2009, Shen et al. 2015, Fang et al. 2016). However,  
84 the mechanisms by which *CHD8* directly regulates target gene expression, whether *CHD8*  
85 targets cell- and stage-specific genes in the developing brain, and which patterns of  
86 transcriptional dysregulation are due to direct effects versus downstream or secondary changes to  
87 *CHD8* regulation remain unresolved.

88

89 There are a growing number of studies that have explored the role of CHD8 in  
90 neurodevelopment, providing the opportunity to test for core features of CHD8 genomic  
91 interactions and transcriptomic dysregulation associated with *CHD8* haploinsufficiency.  
92 Published studies have encompassed both *in vitro* and *in vivo* systems with shRNA knockdown  
93 or genetic mutation of *CHD8*. Despite the variety of models there appear to be general patterns  
94 of neurodevelopmental disruption caused by reduced *CHD8* expression, characterized by  
95 impacts to cellular proliferation, neuronal differentiation, and synaptic function. However,  
96 discrepancies between cellular and behavioral findings make it difficult to reconcile core features  
97 of cellular pathology. While published models of *CHD8* haploinsufficiency vary considerably,  
98 nearly all such studies have leveraged genomic approaches to determine the impact of *CHD8*  
99 haploinsufficiency on gene expression. Many have also examined CHD8 interaction targets  
100 genome-wide. The methods used for these experiments, RNA sequencing (RNA-seq) and  
101 chromatin immunoprecipitation followed by sequencing (ChIP-seq) can generate comparable,  
102 unbiased, and quantitative data enabling direct comparisons of results across models and studies.  
103 We hypothesized that meta-analysis of these datasets using the same computational methods may  
104 capture the consistent patterns of transcriptional pathology associated with *CHD8*  
105 haploinsufficiency and reveal constitutive and model-specific genomic interaction patterns of  
106 CHD8.

107  
108 Here, we re-analyzed published RNA- and ChIP-seq data from *CHD8 in vitro* and *in vivo*  
109 mouse and human models, and built an online user interface to enable customizable data analysis  
110 and visualization across transcriptomic studies of *CHD8* haploinsufficiency. Across studies, we  
111 found a reproducible set of high-affinity CHD8 interaction target genes important for cellular  
112 homeostasis, with many datasets additionally exhibiting downregulated gene expression of these  
113 targets. We also found a secondary signature of transcriptional dysregulation of genes important  
114 for neuronal development and function consistent with *CHD8* haploinsufficiency. The findings  
115 of this meta-analysis indicate evolutionarily-conserved functions of CHD8, with reductions in  
116 *CHD8* expression directly and indirectly altering transcription of genes critical for cellular  
117 homeostasis and neurodevelopment in mouse and human models.

## 118 119 **MATERIALS AND METHODS**

### 120 121 ***CHD8* genomic datasets**

122  
123 Next generation sequencing datasets generated from *CHD8* studies were identified through  
124 a literature search of publications featuring the keyword “CHD8” in the PubMed and Gene  
125 Expression Omnibus (GEO) databases. Raw data from publications that featured RNA-seq or  
126 ChIP-seq analysis were downloaded from GEO with the exception of three publications that hosted  
127 raw data on DDBJ (Katayama et al. 2016) and SRA (Platt et al. 2017, Wilkinson et al. 2015). A  
128 total of twelve publications corresponding to 289 sequencing libraries were included in the  
129 analysis. Libraries from Cotney et al. (2015) generated from fetal brain and libraries from Han et  
130 al. (2017) designed for analysis of alternative splicing were not included in the analysis. All data  
131 included were stated to be compliance with respective animal care and use committees at time of  
132 original publication.

133  
134

135 **RNA-seq analysis**

136

137 RNA-seq computational analysis was performed following an established pipeline using  
138 standard software, as described previously (Gompers et al. 2017). Briefly, unaligned sequencing  
139 reads were assessed for general quality using FastQC (Version 0.11.2) and aligned to the mouse  
140 (mm9) or human (GRCh37) reference genome using STAR (Version 2.5.2b, Dobin et al. 2013).  
141 Aligned reads mapping to genes according to the mm9 genes.gtf or to gencode.v19.annotation.gtf  
142 were counted at the gene level using subreads featureCounts (Version 1.5.0-p1, Liao et al. 2014).  
143 Overall data quality, including testing for GC-bias, gene body coverage bias, and proportion of  
144 reads in exons was further assessed using RSeQC (Version 2.6.4, Wang et al. 2012). Raw gene  
145 count data and sample information as reported in the respective repositories were used for  
146 differential expression analysis using edgeR (Version 3.4.4, Robinson et al. 2010). Genes with at  
147 least 1 count per million were included in a general linearized model using a sequencing-run factor-  
148 based covariate with genotype or knockdown as the variables for testing. For some datasets  
149 additional covariates were included if described in the original publication. Where possible, overall  
150 patterns of differentially expressed genes were compared to the original publication to ensure  
151 consistency in results. Normalized expression levels were generated using the edgeR rpkm  
152 function. Normalized  $\log_2(\text{RPKM})$  values were used for plotting summary heatmaps and for  
153 expression data of individual genes. Variation in sequencing depth and intra-study sample  
154 variability partially account for differences in sensitivity and power across studies and likely drive  
155 some of the differences observed across studies, including the total number of differentially  
156 expressed genes. To capture an inclusive set of differentially expressed genes (DEGs), DEGs were  
157 defined by uncorrected p-values  $< 0.05$ . DEG sets were used for gene set enrichment analysis for  
158 Gene Ontology terms.

159

160 **ChIP-seq analysis**

161

162 ChIP-seq analysis was also performed using an established pipeline and standard methods,  
163 as reported before (Gompers et al. 2017). Briefly, unaligned sequencing reads were assessed for  
164 general quality using FastQC and mapped to the mouse (mm9) or human (hg19) genome using  
165 BWA (Version 0.7.13, Li and Durbin 2009). Significant peaks with a p-value of  $< 0.0001$  were  
166 identified using MACS2 (Version 2.1.0, Feng et al. 2011) with model-based peak identification  
167 and local significance testing disabled. Test datasets were analyzed comparing each individual  
168 ChIP-seq experiment to matched input or IgG controls. Input and IgG libraries were analyzed  
169 using the same approach to test for technical artifacts that could confound ChIP-seq results  
170 generally following a previously reported quality control strategy (Marinov et al. 2014). Enriched  
171 regions from IP and control datasets were annotated to genomic features using custom R scripts  
172 and the combined UCSC and RefSeq transcript sets for the mouse or human genome build. CHD8  
173 target genes were assigned by peak annotation to transcript start site (TSS) or to the nearest TSS  
174 for distal peaks. HOMER was used to perform *de novo* motif discovery with default parameters  
175 (Version 4.7, Heinz et al. 2010). Where possible, we verified that results from ChIP-seq reanalysis  
176 were consistent with original publication.

177

178

179

180

## 181 **Gene ontology enrichment**

182

183 The goseq R package (Version 1.30.0, Young et al. 2010) was used to test for enrichment  
184 of gene ontology terms while correcting for gene length. Analysis included GO Biological Process,  
185 Molecular Function, and Cellular Component annotations and required a minimal node size, or  
186 number of genes annotated to GO terms, of 20. The internal ‘weight01’ testing framework and  
187 Fishers test was used to account for multiple testing comparisons. Down- and upregulated genes  
188 were examined separately for RNA-seq GO analysis using a goseq FDR < 0.05 cutoff. CHIP-seq  
189 gene sets for the GO analysis were analyzed for experimental and control libraries separately also  
190 with a goseq FDR < 0.05 cutoff. Test gene sets for DEGs and CHD8 interaction targets were  
191 compared against a background set of expressed genes based on the minimum read-count cutoffs  
192 for each dataset for DEGs or a background set of all conserved mouse-human genes identified  
193 across RNA-seq datasets for CHD8 target genes. Heatmaps showing positive  
194  $\log_2(\text{expected/observed})$  values were plotted for GO terms for data visualization.

195

## 196 **Code and data availability and additional analysis visualization**

197

198 Data that support the findings of this study are available from the corresponding author  
199 upon request. Accession numbers in parentheses and DOIs for all published gene sets used in  
200 enrichment analysis:

201

202 Ceballos-Chavez et al. (GSE62428): <https://dx.doi.org/10.1371/journal.pgen.1005174>;

203 Cotney et al. (GSE57369): <https://dx.doi.org/10.1038/ncomms7404>;

204 de Dieuleveult et al. (GSE64825): <https://dx.doi.org/10.1038/nature16505>;

205 Durak et al. (GSE72442): <https://dx.doi.org/10.1038/nn.4400>;

206 Gompers et al. (GSE99331): <https://dx.doi.org/10.1038/nn.4592>;

207 Katayama et al. (DRA003116): <https://dx.doi.org/10.1038/nature19357>;

208 Platt et al. (PRJNA379430): <https://dx.doi.org/10.1016/j.celrep.2017.03.052>;

209 Shen et al. (GSE71183, GSE71185): <https://dx.doi.org/10.1016/j.molcel.2015.10.033>;

210 Sugathan et al. (GSE61492): <https://dx.doi.org/10.1073/pnas.1405266111>;

211 Wang et al. 2015 (GSE71594): <https://dx.doi.org/10.1186/s13229-015-0048-6>;

212 Wang et al. 2017 (GSE85417): <https://dx.doi.org/10.1186/s13229-017-0124-1>;

213 Wilkinson et al. (PRJNA305612): <https://dx.doi.org/10.1038/tp.2015.62>;

214

215 Expanded results of the meta-analysis reported here are available from the interactive web  
216 server at [https://nordlab.shinyapps.io/rna\\_browser/](https://nordlab.shinyapps.io/rna_browser/). CHIP-seq datasets are available as UCSC  
217 TrackHubs for upload to the UCSC Genome Browser. All custom scripts for data processing and  
218 analysis are available at <https://github.com/NordNeurogenomicsLab/>.

219

## 220 **RESULTS**

221

### 222 **Consistent patterns of transcriptional pathology associated with *CHD8* haploinsufficiency**

223

224 We reanalyzed a total of 240 RNA sequencing libraries corresponding to 10 studies of  
225 *CHD8* knockdown or heterozygous mutation (**Table 1**). Almost all datasets represented neuronal  
226 model systems except for one dataset using an acute myeloid leukemia cell line (Shen et al.

227 2015). Analysis of all datasets was performed using the same pipeline with quality control steps  
228 and study-specific exceptions for consistency and covariate and batch structure as described in  
229 original publication (**Figure 1A**). Unsurprisingly, relative gene expression levels varied widely  
230 across studies, with principle components of variation dominated by species of origin and  
231 experiment (**Figure 1B**). However, pairwise comparisons between DEGs from individual  
232 datasets revealed specific similarities in gene expression changes. For example, comparison of  
233 DEGs at the  $p < 0.01$  cutoff level between the Gompers et al. (2017) and the Sugathan et al.  
234 (2014) datasets revealed a strong positive correlation in direction of differential gene expression,  
235 where genes that were significantly up- or down-regulated in one dataset followed the same  
236 pattern in the other (**Figure 1C**). Further pairwise comparisons between studies and expression  
237 for specific genes can be done using our interactive web browser available at  
238 [https://nordlab.shinyapps.io/rna\\_browser/](https://nordlab.shinyapps.io/rna_browser/). This interactive resource allows for analysis of  
239 principle components, differential expression of individual genes, and overall differential  
240 expression patterns for all included datasets (**Supplemental Figure 1**). New data from *CHD8*  
241 models will be added to this site as they are published and available.

242  
243 Considering expression of *CHD8* itself, most knockdown and heterozygous knockout  
244 models resulted in a 50-60% significant decrease in mRNA (**Figure 1D**). However, published  
245 data from some models only showed a subtle decrease or even a significant increase in *CHD8*.  
246 We verified that these findings were consistent with originally published RNA-seq data. The  
247 absence of reduced *CHD8* mRNA expression for some studies raises questions regarding what  
248 expectations should be for gene dosage models. We note that protein level validation of *CHD8*  
249 dosage decrease was performed in all original publications to confirm *CHD8* haploinsufficiency  
250 in each model but considering the use of a number of different and unvalidated *CHD8* antibodies  
251 across the studies, it is impossible to compare the protein validation results.

252  
253 As expected, across all studies there were upregulated and downregulated genes passing  
254 stringent thresholds, though the numbers of DEGs varied widely. Consistent with the original  
255 publications, this re-analysis demonstrates *CHD8* has direct or indirect roles in both facilitating  
256 and repressing gene expression (**Figure 1E**). Large differences in number and effect size of  
257 differentially expressed genes across studies may be a result of differences in experimental  
258 design, impact of knockdown and knockout on *CHD8* dosage, methods, and statistical sensitivity  
259 related to intra-study sample variability and sequencing depth. Variability in gene expression  
260 could also be due to differences in sensitivity to *CHD8* dosage between developmental stages  
261 and type of model used to carry out these experiments.

262  
263 **Changes in *CHD8* expression affect genes important for cellular homeostasis and neuronal**  
264 **function**

265  
266 To examine patterns of transcriptional dysregulation associated with knockdown or  
267 heterozygous mutation to *CHD8*, we performed gene set enrichment analysis of Gene Ontology  
268 (GO) terms including datasets with at least 500 differentially expressed genes (**Figure 2**).  
269 Specific GO terms were chosen based on observed changes or interest to the field based on  
270 previous findings (for example, “canonical Wnt signaling pathway”). The full list of GO terms  
271 and relative enrichment is also provided (**Supplementary Figure 2**). While relatively small  
272 numbers of individual genes showed overlapping significant changes in expression across

273 pairwise study comparisons, we found strong correlation in DEG functional groups across  
274 studies at the gene set level. This analysis identified two general signatures of differential gene  
275 expression across published models. The first signature was characterized by downregulation of  
276 genes annotated to terms related to the regulation of chromatin, transcription, and RNA  
277 processing, which we refer to as general cellular homeostasis (homeostasis) genes. As a whole,  
278 these are genes that do not exhibit cell specificity and are necessary for basic cell functions, such  
279 as chromatin organization, transcription and translation, and mitosis. This includes terms such as  
280 “RNA splicing,” “regulation of gene expression,” and “cell cycle.” The second signature  
281 encompassed terms related to neuronal development, maturation, and function, including terms  
282 associated with neural progenitor activity and lineage specification, synaptic function, and cell  
283 adhesion. We refer to these genes as neuronal function (neuronal) genes, and these genes showed  
284 both down- and up-regulation depending on the model. Examples of these terms include “neuron  
285 differentiation,” “axon guidance,” and “cell adhesion.”

286  
287 GO analysis showed different patterns of expression between upregulated and  
288 downregulated genes. Upregulated genes were mainly enriched for neuronal terms across models  
289 (**Figure 2, top**). In contrast, downregulated genes were enriched in homeostatic and neuronal  
290 terms in distinct patterns (**Figure 2, bottom**). Of 22 datasets, around 7 had neuronal terms  
291 enriched, 7 had homeostatic terms enriched, and 8 had a combination of both. The trend of  
292 enrichment of these signatures showed some correlation to the model system used in each study.  
293 *In vitro* models were more likely to have neuronal terms represented while *in vivo* models were  
294 more likely to have both, or only homeostatic terms, represented. There is also some indication  
295 that *in vivo* models of postnatal brain were more likely to have enrichment of neuronal terms  
296 while models of embryonic brain were more likely to have enrichment of homeostasis terms, but  
297 this remains a preliminary assessment requiring more robust data across developmental stages.  
298 Hierarchical clustering of all RNA-seq datasets reinforced this pattern, though enrichment of  
299 these signatures was weaker for datasets with fewer than 500 differentially expressed genes  
300 (**Supplementary Figure 3**). We note that there were also GO terms enriched only in individual  
301 datasets (**Supplementary Figure 2**). Overall, our results suggest that *CHD8* knockdown or  
302 heterozygous knockout consistently influences homeostatic and neuronal pathways, which are  
303 likely to drive the cellular, anatomical, and behavioral pathology reported in studies of *CHD8*  
304 haploinsufficiency.

305

### 306 **CHD8-DNA interactions occur throughout the genome enriched for promoters**

307

308 We reanalyzed a total of 49 ChIP-seq sequencing libraries from 8 studies of CHD8  
309 genomic interaction patterns (**Table 2**). Analyzed datasets represented both neuronal and non-  
310 neuronal model systems. We included both *in vivo* tissue preparations and *in vitro* culture models  
311 from neuronal and non-neuronal fate cells to allow additional examination of tissue or cell-type  
312 specificity of CHD8 interactions. Half of the datasets were generated from bulk mouse tissue at  
313 adult (3 studies; Gompers et al. 2017, Katayama et al. 2016, Platt et al. 2017) and embryonic (2  
314 studies; Katayama et al. 2016, Cotney et al. 2015) timepoints allowing for investigation of CHD8  
315 interactions *in vivo* across time. The remaining data were generated from cellular models, with  
316 two studies using human neuronal lineage cells (Sugathan et al. 2014, Cotney et al. 2015), two  
317 using mouse or human cancer cell lines (Ceballos-Chavez et al. 2015, Shen et al. 2015), and one  
318 using mouse embryonic stem cells (de Dieuleveult et al. 2016). ChIP-seq data were analyzed



319 using the same steps for immunoprecipitated, or experimental, and control data in our analysis  
320 pipeline (**Figure 3A**). There was large variation in number of called peaks, likely due to  
321 experimental design and technical differences (**Figure 3B**). Eleven of the control ChIP-seq  
322 libraries were found to have more than 250 called peaks with strong promoter enrichment  
323 (**Figure 3B-C**), suggesting some level of technical artifact associated with chromatin preparation  
324 (Marinov et al. 2014). Considering these experimental issues, control ChIP-seq libraries with  
325 >250 peaks were included in the analysis to test for similarity between technical artifacts and  
326 CHD8 immunoprecipitated signatures in these datasets.

327  
328 Across all ChIP-seq datasets, CHD8 genomic interactions most commonly occurred near  
329 promoters (**Figure 3C**). Furthermore, binding to promoter-defined peaks tended to approach  
330 100% as the number of called peaks decreased, suggesting that higher affinity interactions for  
331 CHD8 are largely at promoters. Increased affinity and frequency of promoter interactions by  
332 CHD8 was clearly evident in the coverage data signal for both mouse tissues (**Figure 4A**) and  
333 human cell lines (**Figure 4B**). For example, four genes encoding a transcription factor (*ADNP*), a  
334 chromatin remodeler (*SUV420H1*), a splicing factor (*TRA2B*), and a calcium binding protein  
335 important for cell cycle progression and ion channel signaling (*CALM2*) displayed CHD8  
336 interactions almost exclusively near promoters.

337  
338 *De novo* motif analysis performed on CHD8 peak regions across experiments identified  
339 various general promoter-associated transcription factor binding sequences, but no clear primary  
340 binding motif for CHD8 (**Supplementary Figure 4**). These findings are consistent with original  
341 publications, none of which identified a strong candidate primary binding motif, suggesting that  
342 CHD8 interactions are not mediated by direct DNA sequence recognition. Instead these results  
343 suggest that CHD8 genomic interaction specificity likely occurs through secondary interactions.

344  
345 CHD8 GO analysis of the top 2000 called peaks ranked by signal strength and  
346 significance highlighted surprisingly consistent CHD8 interactions near homeostatic gene  
347 promoters at the FDR < 0.05 GO term association cutoff level (**Figure 5 top left**). When  
348 analyzing all called peaks, these terms were still enriched (**Figure 5 bottom left**). Analysis of all  
349 called peaks also identified CHD8 interactions with the expanded set of promoters that included  
350 genes associated with neuronal differentiation and function, as previously observed (**Figure 4**).  
351 However, unlike homeostatic gene targets, neuronal gene interaction was not statistically  
352 enriched across all relevant models suggesting the neuronal promoter interactions tended to have  
353 lower affinity and are not as a set enriched as CHD8 regulatory targets. Testing for the  
354 proportion of genes enriched for each GO term further indicated homeostatic gene promoter  
355 target specificity. We found significant enrichment of homeostatic promoter targets when  
356 analyzing the top 2000 peaks (**Figure 5 top right**). In contrast, almost all other GO terms were  
357 represented when considering all called peaks (**Figure 5 bottom right**). This suggested that  
358 while CHD8 has interactions throughout the genome with loci associated with various functions,  
359 homeostatic genes are consistent, high affinity CHD8 targets regardless of the model system.

360  
361  
362  
363

364 **Relationship between genomic interaction targets and gene expression changes across**  
365 **CHD8 studies**

366  
367 Given that CHD8 targets a consistent set of promoters with a high level of affinity as well  
368 as an expanded set of loci with lower levels of affinity and *CHD8* knockdown or heterozygous  
369 knockout causes changes to gene expression, we tested whether CHD8 genomic interactions  
370 directly relate to changes in gene expression in *CHD8* models. Most genes with CHD8  
371 interactions at or distal to the promoter did not exhibit significant changes in gene expression,  
372 regardless of the study, suggesting that there are additional determinants regarding sensitivity of  
373 regulatory target genes to *CHD8* dosage. While we did observe consistent patterns of overlap  
374 between CHD8 targets and downregulated DEGs, upregulated DEGs were not enriched across  
375 studies for CHD8 genomic interactions. Regardless of the experiment, CHD8 interaction affinity  
376 was also strongest for genes that were more highly expressed (**Supplementary Figure 5**).  
377

378 For a subset of RNA-seq results, there was a strong overlap between CHD8 target genes  
379 from the ChIP-seq data and downregulated DEGs involved with cellular homeostasis. For  
380 example, when using the Gompers et al. (2017) RNA-seq data, there was an increased signature  
381 of downregulation in *Chd8* heterozygous mouse brain as CHD8 target affinity (i.e. ChIP-seq  
382 peak strength) increased (**Figure 6**). This was not unexpected considering homeostatic genes  
383 made up one of the two major signatures of differential gene expression we found and was the  
384 most strongly enriched set for CHD8 interaction. Eight out of the 18 analyzed datasets showed  
385 this overlap trend (**Supplementary Figure 6**). For instance, an increased signature of  
386 downregulation was also observed as CHD8 target affinity increased with *in vivo Chd8*  
387 knockdown in fetal mouse brain (Durak et al. 2016), though this RNA dataset had both neuronal  
388 and homeostatic terms enriched for DEGs (**Supplementary Figure 7**).  
389

390 Genes associated with cellular homeostasis also tend to be at the high end of transcript  
391 expression level distributions, suggesting a relationship between highly expressed genes and  
392 dosage-sensitive CHD8 regulatory function. However, high levels of expression alone did not  
393 predict CHD8 interaction or DEG, indicating that expression level does not solely determine  
394 CHD8 interactions or sensitivity of regulatory targets to reduced *CHD8* dosage. This trend of  
395 negative correlation between CHD8 interaction affinity and changes in gene expression was less  
396 apparent with datasets having fewer than 500 differentially expressed genes and for the datasets  
397 (including many generated from *in vitro* models) where homeostasis gene expression signatures  
398 were not present (**Supplementary Figure 6, Figure 2**).  
399

400 While our findings show model-specific variation, the patterns present across *CHD8*  
401 studies suggest a consistent relationship where reduced expression of *CHD8* leads to  
402 downregulation of CHD8 target genes associated with the cellular homeostasis signature, such as  
403 genes involved in cell cycle, chromatin organization, and RNA transcription and processing.  
404 These changes are seemingly stronger in *in vivo* models representing early stages of brain  
405 development, though they are still present in some models representing more mature brain tissue  
406 and cell types (**Figure 2**). In contrast, the observed differential expression of neuronal  
407 differentiation and neuronal function (e.g. synaptic) genes tends to occur in models representing  
408 more mature neuronal tissue or cell types and differentiated culture models inherently containing  
409 heterogenous cell populations at unknown stages of development.

## 410 DISCUSSION

411

412 This meta-analysis of published genomic datasets from *in vitro* and *in vivo* mouse and  
413 human studies revealed both consistent and study-specific effects of *CHD8* haploinsufficiency  
414 on gene expression and largely concordant high-affinity *CHD8* genomic interaction loci.  
415 Knockdown or heterozygous mutation of *CHD8* led to characteristic changes in gene expression  
416 across studies and model systems. At the gene-by-gene level, these expression changes varied  
417 considerably between *CHD8* models. However, at the level of gene set enrichment, we found  
418 global patterns of transcriptional dysregulation of genes involved in cellular homeostasis and  
419 neuronal development and function. Comparison across ChIP-seq experiments shows that *CHD8*  
420 preferentially targets promoters, with no evidence of direct binding through a specific DNA  
421 motif. Surprisingly, we found that peaks with the highest signal were constant across  
422 experiments, regardless of the model, suggesting that *CHD8* preferentially interacts with  
423 promoters of a set of genes linked to processes involved in cellular homeostasis, genome  
424 function, and RNA processing. Our findings strongly support signatures of reduced transcription  
425 of *CHD8* target genes in the studied models that were dependent on dosage, though our data also  
426 highlight widespread genomic promoter interactions for *CHD8* without obvious strong impacts  
427 to most targets. We verified the presence of changes to gene expression specific to neuronal  
428 differentiation and function following *CHD8* haploinsufficiency across studies, however, these  
429 changes do not appear to be through direct disruption to neural cell-type or stage-specific *CHD8*  
430 regulatory activity via high-affinity interactions with relevant promoters. While the clear  
431 concordance in high-affinity genomic *CHD8* interactions suggests common regulatory functions  
432 across cell types, it remains to be examined whether the observed dysregulation of neuronal  
433 genes is related to context-dependent *CHD8* regulatory activity in the brain given the current  
434 cellular heterogeneity and technical challenges existing with available *CHD8* ChIP-seq. Our  
435 results illustrate the power and limitations of comparing genomic datasets and challenge previous  
436 assumptions regarding the regulatory mechanisms and transcriptional pathology associated with  
437 *CHD8* haploinsufficiency.

438

439 We note a number of technical issues that impacted this meta-analysis, many of which  
440 are associated with variation in methods and sequencing depth. Surprisingly, we found  
441 considerable differences in *CHD8* expression across models despite the common design of  
442 testing the impacts of haploinsufficiency. Though we did not find an obvious correlation between  
443 *CHD8* transcript levels and up- or downregulated gene expression, it seems likely that  
444 differences in experimental design, including *CHD8* knockdown or knockout, contributed toward  
445 meaningful variation between models. Changes to *CHD8* dosage have been shown to have strong  
446 and potentially opposing effects on cellular function. For instance, homozygous knockout of  
447 *CHD8* has been described to cause severe developmental arrest and widespread apoptosis  
448 leading to early embryonic lethality (Nishiyama et al. 2009) while heterozygous mutation can  
449 lead to increases in proliferation (Gompers et al. 2017). These are important considerations for  
450 interpreting studies of haploinsufficiency, as allelic or genetic background effects as well as  
451 variation in transcriptional knockdown with shRNA constructs may have significant biological  
452 consequences. At a minimum, consistent measures of *CHD8* knockdown or haploinsufficiency,  
453 such as measuring transcript-level mRNA levels with RNA-seq or protein levels with a  
454 standardized antibody and methodology, should be a goal for future studies to enable comparison  
455 across publications. We also noted differences in ChIP-seq datasets that hindered comparisons.

456 For example, enrichment in control libraries was present across several published datasets.  
457 Different studies also used various CHD8 antibodies with unknown and unvalidated CHD8  
458 specificities. Nonetheless, by examining patterns across datasets, we identified consistent  
459 patterns of enrichment suggesting that overall findings from CHIP-seq targeting CHD8 could  
460 reliably identify high affinity interactions.

461  
462 Despite the limitations of comparing genomic datasets across variable models, our  
463 analysis challenges two simple models regarding pathological mechanisms of *CHD8*  
464 haploinsufficiency. The first model the transcriptional signatures present across studies refute is  
465 that pathology due to *CHD8* haploinsufficiency is primarily due to alterations in patterning  
466 during early brain development. While our meta-analysis clearly supports impacts to  
467 proliferation and neuronal differentiation consistent with published findings on proliferation and  
468 brain volume (Bernier et al. 2014, Gompers et al. 2017, Katayama et al. 2016, Platt et al. 2017,  
469 Durak et al. 2016), we also observed evidence of dysregulation of genes involved in mature  
470 neuron function, including synaptic genes. This is consistent with observation that CHD8 is still  
471 highly expressed in adulthood (Gompers et al. 2017, Platt et al. 2017, Maussion et al. 2015), that  
472 mutations to *CHD8* continue to lead to differential gene expression and behavioral phenotypes in  
473 adult mice (Gompers et al. 2017, Katayama et al. 2016, Platt et al. 2017), and with limited  
474 evidence of synaptic dysfunction associated with *Chd8* haploinsufficiency (Platt et al. 2016).  
475 Further work will be required to establish the role and requirement for CHD8 in mature neurons  
476 and other cell types in the brain.

477  
478 Second, the signatures present in this meta-analysis suggest that pathology observed in  
479 *CHD8* models and patients with *CHD8* mutations is not due to targeted impacts to specific  
480 populations of cell-types or due to impacts limited to specific brain regions. In this analysis of  
481 many individual datasets, CHD8 had genomic interactions near promoters of genes important for  
482 cellular homeostasis and neuronal development and function that were enriched in the  
483 transcriptomic analysis. However, only homeostasis genes were characterized as high affinity  
484 CHD8 targets and tended to be sensitive to decreases in *CHD8* expression and  
485 haploinsufficiency. Despite evidence that these genes are not high-affinity CHD8 targets, we did  
486 observe enrichment of differentially expressed neuronal genes in the CHD8 interaction analysis.  
487 One explanation for this finding is that *CHD8* haploinsufficiency indirectly causes large-scale  
488 dysregulation of neuronal genes via disruptions to upstream transcriptional regulators that are  
489 direct CHD8 targets. This would explain the appearance of cell-type-specific transcriptional  
490 changes in the absence of actual cell-type specific CHD8 function. Nonetheless, given the  
491 technical limitations of current studies we cannot rule out the possibility of cell-type or context-  
492 dependent specificity of CHD8 function.

493  
494 It is clear from previous publications and this meta-analysis that CHD8 is critical for  
495 neurodevelopment. Our results suggest that CHD8 functions to regulate cellular homeostasis  
496 required for genomic control of proliferation and differentiation. As an essential gene with  
497 widespread expression across neuronal and glial cell types, homozygous loss of *CHD8* may  
498 impact cellular viability in general, while heterozygous mutation or knockdown might have  
499 subtler, context-specific impacts. Such a model would explain the widespread changes in gene  
500 expression across model systems and varied reports of impact on proliferation depending on  
501 dosage. Our results raise two questions that could be addressed by application of RNA-seq and

502 ChIP-seq in the future: 1) What are the developmental stage, cell-type, and region-specific  
503 impacts of *CHD8* haploinsufficiency in the developing and mature brain, and 2) Does CHD8  
504 have context-dependent function in specific stages, cell types, and regions with regard to  
505 genomic interaction patterns? Beyond addressing these two key issues, additional clarity  
506 regarding the role of CHD8 in the brain will come from studies examining the molecular  
507 interaction partners and impacts on chromatin, transcription, and RNA processing. As *CHD8*  
508 haploinsufficiency may represent common features of haploinsufficiency of other general  
509 chromatin remodelers implicated in patient studies, further characterization of *CHD8* models and  
510 CHD8 genomic interactions could reveal essential functions driving pathology in  
511 neurodevelopmental disorders.

512

### 513 **AUTHOR CONTRIBUTIONS**

514

515 AW and AN conceived of the project. AW, KL, and AN performed analysis of RNA-seq  
516 experiments. AW, RCP, and AN performed analysis of ChIP-seq experiments. AW and AN  
517 drafted the manuscript. All authors contributed to manuscript revision.

518

### 519 **FUNDING**

520

521 AW was supported by Training Grant number T32-GM007377 from NIH-NIGMS. RCP was  
522 supported by a Science Without Borders Fellowship from CNPq (Brazil). AN was supported by  
523 NIH-NIGMS R35 GM119831.

524

### 525 **ACKNOWLEDGEMENTS**

526

527 The authors would like to thank the authors from the original *CHD8* studies who provided access  
528 to the raw data for analysis.

529

### 530 **CONFLICT OF INTEREST STATEMENT**

531

532 The authors declare that there is no conflict of interest.

## REFERENCES

- Barnard, R. A., Pomaville, M. B., and O’Roak, B. J. (2015). Mutations and modeling of the chromatin remodeler CHD8 define an emerging autism etiology. *Front. Neurosci.* 9, 477. doi: 10.3389/fnins.2015.00477
- Bernier, R., Golzio, C., Xiong, B., Stessman, H., Coe, B., Penn, et al. (2014). Disruptive *CHD8* mutations define a subtype of autism early in development. *Cell* 158, 263-276. doi: 10.1016/j.cell.2014.06.017
- Ceballos-Chávez, M., Subtil-Rodríguez, A., Giannopoulou, E., Soronellas, D., Vázquez-Chávez, E., Vicent, G., et al. (2015). The chromatin remodeler CHD8 is required for activation of progesterone receptor-dependent enhancers. *PLoS Genet.* 11, e1005174. doi: 10.1371/journal.pgen.1005174
- Cotney, J., Muhle, R., Sanders, S., Liu, L., Willsey, A., Niu, W., et al. (2015). The autism-associated chromatin modifier CHD8 regulates other autism risk genes during human neurodevelopment. *Nat. Comm.* 6, 6404. doi: 10.1038/ncomms7404
- de Dieuleveult, M., Yen, K., Hmitou, I., Depaux, A., Boussouar, F., Dargham, D., et al. (2016). Genome-wide nucleosome specificity and function of chromatin remodellers in ES cells. *Nature* 530, 113-116. doi: 10.1038/nature16505
- De Rubeis, S., He, X., Goldberg, A., Poultney, C., Samocha, K., Ercument Cicek, A., et al. (2014). Synaptic, transcriptional and chromatin genes disrupted in autism. *Nature* 515, 209-215. doi: 10.1038/nature13772
- Dobin, A., Davis, C. A., Schlesinger, F., Drenkow, J., Zaleski, C., Jha, S., et al. (2013). STAR: ultrafast universal RNA-seq aligner. *Bioinformatics* 29, 15–21. doi: 10.1093/bioinformatics/bts635
- Durak, O., Gao, F., Kaeser-Woo, Y., Rueda, R., Martorell, A., Nott, A., et al. (2016). Chd8 mediates cortical neurogenesis via transcriptional regulation of cell cycle and Wnt signaling. *Nat. Neurosci.* 19, 1477-1488. doi: 10.1038/nn.4400
- Fang, M., Hutchinson, L., Deng, A., and Green, M. R. (2016). Common BRAF(V600E)-directed pathway mediates widespread epigenetic silencing in colorectal cancer and melanoma. *PNAS* 113, 1250–1255. doi: 10.1073/pnas.1525619113
- Feng, J., Liu, T., and Zhang, Y. (2011). Using MACS to identify peaks from ChIP-Seq data. *Curr. Protoc. Bioinformatics Chapter 2, Unit 2.14.* doi: 10.1002/0471250953.bi0214s34
- Flanagan, J., Mi, L., Chruszcz, M., Cymborowski, M., Clines, K., Kim, Y., et al. (2005). Double chromodomains cooperate to recognize the methylated histone H3 tail. *Nature* 438, 1181-1185. doi: 10.1038/nature04290
- Gompers, A.L., Su-Feher, L., Ellegood, J., Copping, N.A., Riyadh, A., Stradleigh, T.W., et al. (2017). Germline *Chd8* haploinsufficiency alters brain development in mouse. *Nat. Neurosci.* 20, 1062–1073. doi: 10.1038/nn.4592
- Hall, J., and Georgel, P. (2007). CHD proteins: a diverse family with strong ties. *Biochem. Cell Biol.* 85, 463-476. doi: 10.1139/O07-063
- Han, H., Braunschweig, U., Gonatopoulos-Purnatzis, T., Weatheritt, R.J., Hirsch, C.L., Ha, K.C., et al. (2017). Multilayered Control of Alternative Splicing Regulatory Networks by Transcription Factors. *Mol. Cell* 65, 539-553. doi: 10.1016/j.molcel.2017.01.011

- Hargreaves, D., and Crabtree, G. (2011). ATP-dependent chromatin remodeling: genetics, genomics and mechanisms. *Cell Res.* 21, 396-420. doi: 10.1038/cr.2011.32
- Heinz, S., Benner, C., Spann, N., Bertolino, E., Lin, Y. C., Laslo, P., et al. (2010). Simple combinations of lineage-determining transcription factors prime cis-regulatory elements required for macrophage and B cell identities. *Mol. Cell* 38, 576–589. doi: 10.1016/j.molcel.2010.05.004
- Iossifov, I., O’Roak, B. J., Sanders, S. J., Ronemus, M., Krumm, N., Levy, D., et al. (2014). The contribution of *de novo* coding mutations to autism spectrum disorder. *Nature* 515, 216–221. doi: 10.1038/nature13908
- Ishihara, K., Oshimura, M., and Nakao, M. (2006). CTCF-dependent chromatin insulator is linked to epigenetic remodeling. *Mol. Cell* 23, 733-742. doi: 10.1016/j.molcel.2006.08.008
- Katayama, Y., Nishiyama, M., Shoji, H., Ohkawa, Y., Kawamura, A., Sato, T., et al. (2016). *CHD8* haploinsufficiency results in autistic-like phenotypes in mice. *Nature* 537, 675-679. doi: 10.1038/nature19357
- Krumm, N., O’Roak, B., Shendure, J., and Eichler, E. (2014). A *de novo* convergence of autism genetics and molecular neuroscience. *Trend Neurosci.* 37, 95-105. doi: 10.1016/j.tins.2013.11.005
- Li, H., and Durbin, R. (2009). Fast and accurate short read alignment with Burrows-Wheeler transform. *Bioinformatics* 25, 1754–1760. doi: 10.1093/bioinformatics/btp324
- Liao, Y., Smyth, G. K., and Shi, W. (2014). featureCounts: an efficient general purpose program for assigning sequence reads to genomic features. *Bioinformatics* 30, 923–930. doi: 10.1093/bioinformatics/btt656
- Marfella, C., and Imbalzano, A. (2007). The Chd family of chromatin remodelers. *Mutat. Res. Fund. Mol. Mech. Mut.* 618, 30-40. doi: 10.1016/j.mrfmmm.2006.07.012
- Marinov, G. K., Kundaje, A., Park, P. J., and Wold, B. J. (2014). Large-scale quality analysis of published ChIP-seq data. *G3* 4, 209–223. doi: 10.1534/g3.113.008680
- Maussion, G., Diallo, A.B., Gigeck, C. O., Chen, E. S., Crapper, L., Thérroux, J. F., et al. (2015). Investigation of genes important in neurodevelopment disorders in adult human brain. *Hum. Genet.* 134, 1037-1053. doi: 10.1007/s00439-015-1584-z
- McCarthy, S. E., Gillis, J., Kramer, M., Lihm, J., Yoon, S., Berstein, Y., et al. (2014). *De novo* mutations in schizophrenia implicate chromatin remodeling and support a genetic overlap with autism and intellectual disability. *Mol. Psych.* 19, 652–658. doi: 10.1038/mp.2014.29
- McKnight, J., Jenkins, K., Nodelman, I., Escobar, T., and Bowman, G. (2011). Extranucleosomal DNA binding directs nucleosome sliding by Chd1. *Mol. Cell Biol.* 31, 4746-4759. doi: 10.1128/MCB.05735-11
- Nishiyama, M., Oshikawa, K., Tsukada, Y., Nakagawa, T., Iemura, S., Natsume, T., et al. (2009). CHD8 suppresses p53-mediated apoptosis through histone H1 recruitment during early embryogenesis. *Nat. Cell Biol.* 11, 172–182. doi: 10.1038/ncb1831
- O’Roak, B., Vives, L., Fu, W., Egertson, J., Stanaway, I., Phelps, I., et al. (2012a). Multiplex targeted sequencing identifies recurrently mutated genes in autism spectrum disorders. *Science* 338, 1619-1622. doi: 10.1126/science.1227764

- O’Roak, B., Vives, L., Girirajan, S., Karakoc, E., Krumm, N., Coe, B., et al. (2012b). Sporadic autism exomes reveal a highly interconnected protein network of *de novo* mutations. *Nature* 485, 246-250. doi: 10.1038/nature10989
- Parikshak, N., Luo, R., Zhang, A., Won, H., Lowe, J., Chandran, V., et al. (2013). Integrative functional genomic analyses implicate specific molecular pathways and circuits in autism. *Cell* 155, 1008-1021. doi: 10.1016/j.cell.2013.10.031
- Platt, R., Zhou, Y., Slaymaker, I., Shetty, A., Weisbach, N., Kim, J., et al. (2017). *Chd8* mutation leads to autistic-like behaviors and impaired striatal circuits. *Cell Rep.* 19, 335-350. doi: 10.1016/j.celrep.2017.03.052
- Robinson, M. D., McCarthy, D. J., and Smyth, G. K. (2010). edgeR: a Bioconductor package for differential expression analysis of digital gene expression data. *Bioinformatics* 26, 139–140. doi: 10.1093/bioinformatics/btp616
- Rodriguez-Paredes, M., Ceballos-Chavez, M., Esteller, M., Garcia-Dominguez, M., and Reyes, J. (2009). The chromatin remodeling factor CHD8 interacts with elongating RNA polymerase II and controls expression of the cyclin E2 gene. *Nucl. Acid Res.* 37, 2449-2460. doi: 10.1093/nar/gkp101
- Sanders, S. J., He, X., Willsey, A. J., Ercan-Sencicek, A. G., Samocha, K. E., Cicek, A. E., et al. (2015). Insights into autism spectrum disorder genomic architecture and biology from 71 risk loci. *Neuron* 87, 1215–1233. doi: 10.1016/j.neuron.2015.09.016
- Shen, C., Ipsaro, J. J., Shi, J., Milazzo, J. A., Wang, E., Roe, J.-S., et al. (2015). NSD3-short is an adaptor protein that couples BRD4 to the CHD8 chromatin remodeler. *Mol. Cell* 60, 847–859. doi: 10.1016/j.molcel.2015.10.033
- Sugathan, A., Biagioli, M., Golzio, C., Erdin, S., Blumenthal, I., Manavalan, P., et al. (2014). CHD8 regulates neurodevelopmental pathways associated with autism spectrum disorder in neural progenitors. *P.N.A.S.* 111, E4468-E4477. doi: 10.1073/pnas.1405266111
- Tatton-Brown, K., Loveday, C., Yost, S., Clarke, M., Ramsay, E., Zachariou, A., et al. (2017). Mutations in epigenetic regulation genes are a major cause of overgrowth with intellectual disability. *Am. J. Hum. Genet.* 100, 725–736. doi: 10.1016/j.ajhg.2017.03.010
- Thompson, B., Tremblay, V., Lin, G., and Bochar, D. (2008). CHD8 is an ATP-Dependent chromatin remodeling factor that regulates beta-catenin target genes. *Mol. Cell Biol.* 28, 3894-3904. doi: 10.1128/MCB.00322-08
- Tong, J.K., Hassig, C.A., Schnitzler, G.R., Kingston, R.E., and Schreiber, S.L. (1998). Chromatin deacetylation by an ATP-dependent nucleosome remodeling complex. *Nature* 395, 917-921. doi: 10.1038/27699
- Vissers, L. E. L. M., Gilissen, C., and Veltman, J. A. (2016). Genetic studies in intellectual disability and related disorders. *Nat. Rev. Genet.* 17, 9–18. doi: 10.1038/nrg3999
- Wang, L., Wang, S., and Li, W. (2012). RSeQC: quality control of RNA-seq experiments. *Bioinformatics* 28, 2184–2185. doi: 10.1093/bioinformatics/bts356
- Wang, P., Lin, M., Pedrosa, E., Hrabovsky, A., Zhang, Z., Guo, W., et al. (2015). CRISPR/Cas9-mediated heterozygous knockout of the autism gene *CHD8* and characterization of its transcriptional networks in neurodevelopment. *Mol. Autism* 6, 55. doi: 10.1186/s13229-015-0048-6



Wade et al.

CHD8 Regulates Cellular Function Genes

- Wang, P., Mokhtari, R., Pedrosa, E., Kirschenbaum, M., Bayrak, C., Zheng, D., et al. (2017). CRISPR/Cas9-mediated heterozygous knockout of the autism gene *CHD8* and characterization of its transcriptional networks in cerebral organoids derived from iPS cells. *Mol. Autism* 8, 11. doi: 10.1186/s13229-017-0124-1
- Wilkinson, B., Grepo, N., Thompson, B. L., Kim, J., Wang, K., Evgrafov, O. V., et al. (2015). The autism-associated gene chromodomain helicase DNA-binding protein 8 (*CHD8*) regulates noncoding RNAs and autism-related genes. *Transl. Psych.* 5, e568. doi: 10.1038/tp.2015.62
- Young, M. D., Wakefield, M. J., Smyth, G. K., and Oshlack, A. (2010). Gene ontology analysis for RNA-seq: accounting for selection bias. *Genome Biol.* 11, R14. doi: 10.1186/gb-2010-11-2-r14
- Yuan, C., Zhao, X., Florens, L., Swanson, S., Washburn, M., and Hernandez, N. (2007). CHD8 associates with human Staf and contributes to efficient U6 RNA polymerase III transcription. *Mol. Cell Biol.* 27, 8729-8738. doi: 10.1128/MCB.00846-07

FIGURES

Table 1

Summary of RNA-seq datasets included in the *CHD8* model reanalysis; h – human, NSCs – neural stem cells, iPSC – induced pluripotent stem cell, NPC – neural progenitor cell, E – embryonic day, P – postnatal day, Ctx – Prefrontal Cortex, Striat – Dorsal Striatum, Nuc Acc – Nucleus Accumbens, VTA – Ventral Tegmental Area, Hipp – Hippocampal Formation, Amyg – Amygdala, Hyp – Lateral Hypothalamus.

| Manipulation                      | Study                 | Model                                         | System                                                                    | Timepoint(s)                    | Tissue Type                                |
|-----------------------------------|-----------------------|-----------------------------------------------|---------------------------------------------------------------------------|---------------------------------|--------------------------------------------|
| <i>CHD8</i> Knockdown             | Cotney et al. 2015    | H9-derived hNSCs                              | shRNA transfection                                                        | -                               | -                                          |
|                                   | Durak et al. 2016     | Swiss Webster mice                            | E13 shRNA electroporation                                                 | E15                             | GFP <sup>+</sup> Cortical Cells            |
|                                   | Sugathan et al. 2014  | iPSC-derived hNPCs                            | shRNA transfection                                                        | -                               | -                                          |
|                                   | Wilkinson et al. 2015 | SK-N-SH hNeuroblastoma cell                   | siRNA transfection                                                        | -                               | -                                          |
|                                   | Shen et al. 2015      | MLL-AF9/Nras <sup>G12D</sup> mAML (RN2) cells | shRNA transfection                                                        | -                               | -                                          |
| Heterozygous <i>CHD8</i> Mutation | Gompers et al. 2017   | C57BL/6N mice                                 | CRISPR-cas9; Exon 5 (5bp)                                                 | E: 12.5, 14.5, 17.5<br>P: 0, 56 | Bulk Forebrain                             |
|                                   | Katayama et al. 2016  | C57BL/6J mice                                 | Cre-LoxP Recombination (ESC clones injected into blastocysts); Exon 11-13 | E: 10, 12, 14, 16, 18<br>P: 91  | Whole Brain                                |
|                                   | Platt et al. 2017     | C57BL/6J                                      | CRISPR-cas9; Exon 1 (7bp)                                                 | P70-84                          | Ctx, Striat, Nuc Acc, VTA, Hipp, Amyg, Hyp |
|                                   | Shen et al. 2015      | MLL-AF9/Nras <sup>G12D</sup> mAML (RN2) cells | CRISPR-cas9; ATPase, Helicase domains                                     | -                               | -                                          |
|                                   | Wang et al. 2015      | iPSC-derived hNPCs, hNeurons                  | CRISPR-cas9, N-terminus                                                   | -                               | -                                          |
|                                   | Wang et al. 2017      | iPSC-derived hCerebral Organoids              | CRISPR-cas9, N-terminus                                                   | -                               | -                                          |

Figure 1

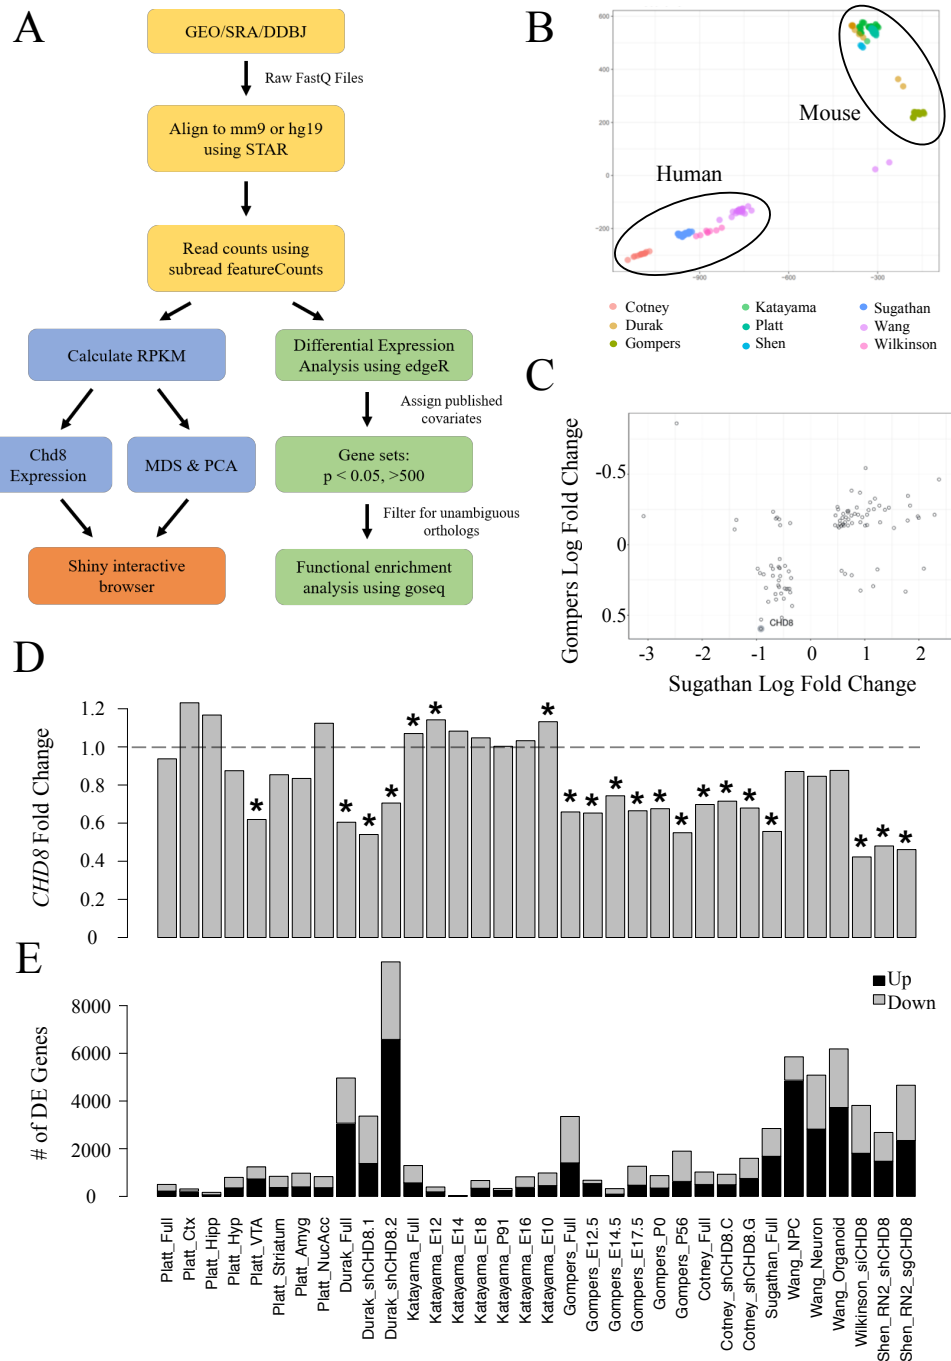

Differential gene expression across *CHD8* models. **(A)** RNA-seq data analysis pipeline. **(B)** PCA showing similarity in gene expression according to species. **(C)** Correlation between the Gompers et al. 2017 and Sugathan et al. 2014 RNA-seq datasets ( $p < 0.01$ ) generated from the Shiny web browser. **(D)** Change in *CHD8* mRNA across models ( $p < 0.05$ ). **(E)** Differential expression genes count across models ( $p < 0.05$ ).

Figure 2

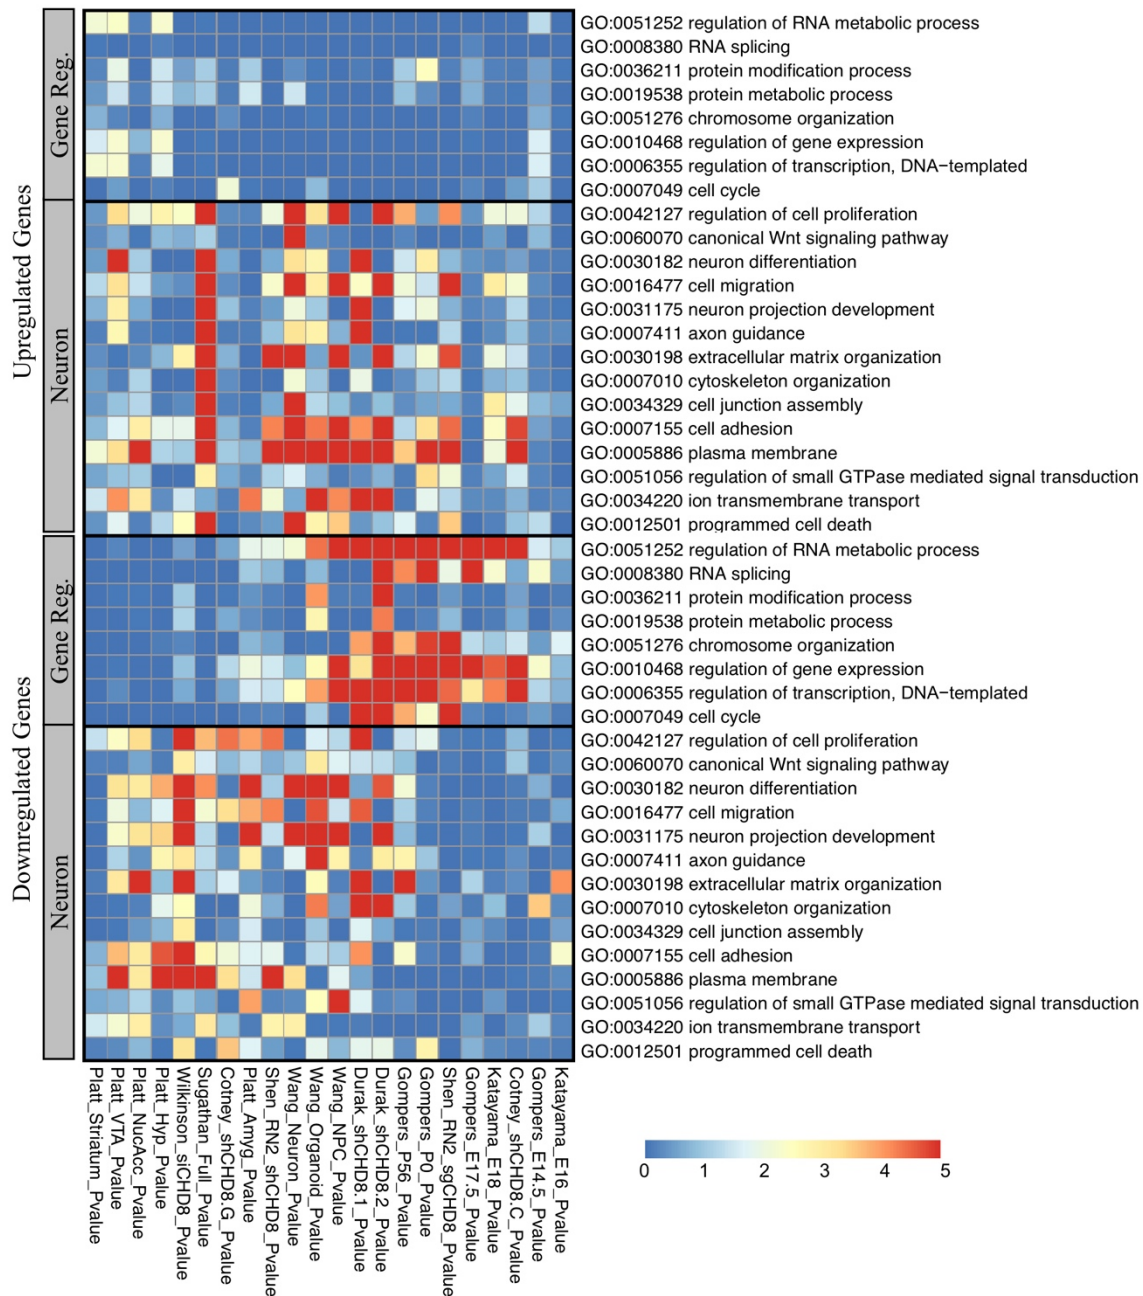

Enrichment of gene regulation and neurodevelopmental ontology terms in Up- and Down-regulated datasets having greater than 500 differentially expressed genes at the  $p < 0.05$  level. **(Top)** Upregulated gene ontology enrichment. **(Bottom)** Downregulated gene ontology enrichment.

Table 2

Summary of datasets included in CHD8 ChIP-seq reanalysis. All datasets were performed using formaldehyde or another similar method of crosslinking before fragmentation and immunoprecipitation; E – embryonic day, P – postnatal day, h – human, NSCs- Neural Stem Cells, m – mouse, ESCs – Embryonic Stem Cells, HA -haemagglutinin, MNase – Micrococcal nuclease, *Chd8*<sup>+/-</sup> – *CHD8* heterozygous mutation carrier.

| Fragmentation Method | Study                       | Model                                            | Timepoint(s)                 | Tissue Collected     | Antibody                                                                       | Control |
|----------------------|-----------------------------|--------------------------------------------------|------------------------------|----------------------|--------------------------------------------------------------------------------|---------|
| Sonication           | Cotney et al. 2015          | C57BL/6J mice; H9-derived hNSCs                  | E17.5; -                     | Frontal Cortex; -    | $\alpha$ CHD8 (Abcam, ab114126)                                                | Input   |
| Sonication & Mnase   | Katayama et al. 2016        | C57BL/6J mice ( <i>Chd8</i> <sup>+/-</sup> & WT) | E14, P91                     | Whole Brain          | $\alpha$ CHD8 (Custom)                                                         | Input   |
| Sonication           | Platt et al. 2017           | C57BL/6J mice ( <i>Chd8</i> <sup>+/-</sup> & WT) | P70-84                       | Somatosensory Cortex | $\alpha$ CHD8 (Novus Biologicals, NB100-60417)                                 | IgG     |
| Sonication           | Ceballos-Chavez et al. 2015 | hT47D-MTVL breast cancer cell                    | Before progestin stimulation | -                    | $\alpha$ CHD8 (Bethyl, A301-224A)                                              | IgG     |
| MNase                | de Dieuleveult et al. 2016  | mESCs with FLAG/HA-tagged CHD8                   | -                            | -                    | $\alpha$ FLAG & $\alpha$ HA                                                    | Input   |
| Sonication           | Gompers et al. 2017         | C57BL/6N mice                                    | ~P56                         | Bulk Forebrain       | $\alpha$ CHD8 (Abcam, ab114126)                                                | Input   |
| Sonication           | Shen et al. 2015            | mRN2 cells                                       | -                            | -                    | $\alpha$ CHD8 (Bethyl, A301-224A)                                              | Input   |
| Sonication           | Sugathan et al. 2014        | iPSC-derived hNPCs                               | -                            | -                    | $\alpha$ CHD8 (Bethyl, A301-224A; Novus Biologicals, NB100-60417, NB100-60418) | Input   |

Figure 3

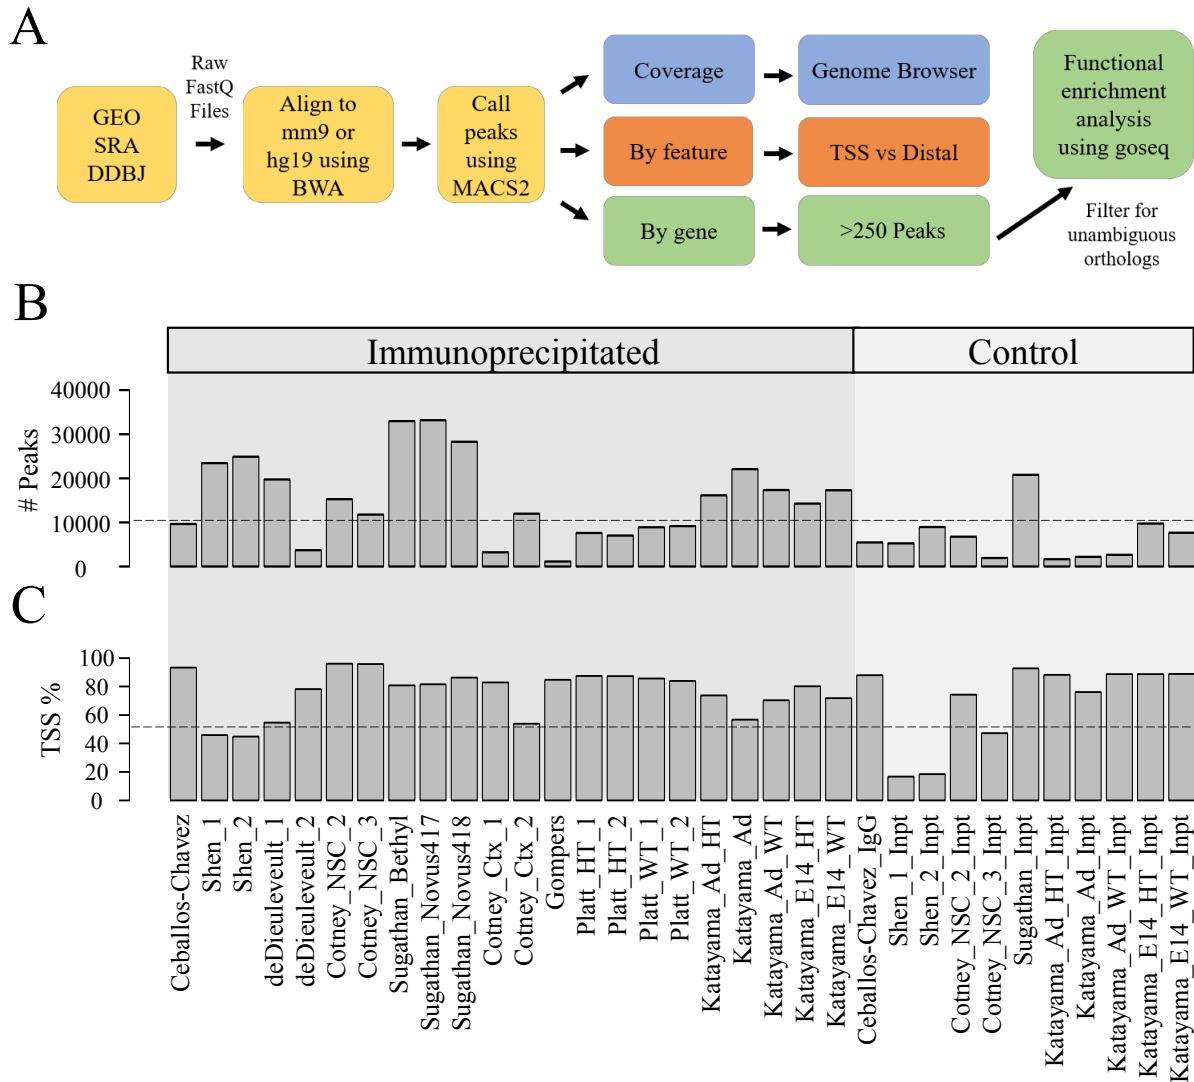

CHD8 binds to promoters across the genome. **(A)** ChIP-seq analysis pipeline. **(B)** Number of called peaks meeting a MACS2 significance of  $p < 0.00001$ . **(C)** Percentage of called peaks overlapping with the transcription start site of the nearest gene.

Figure 4

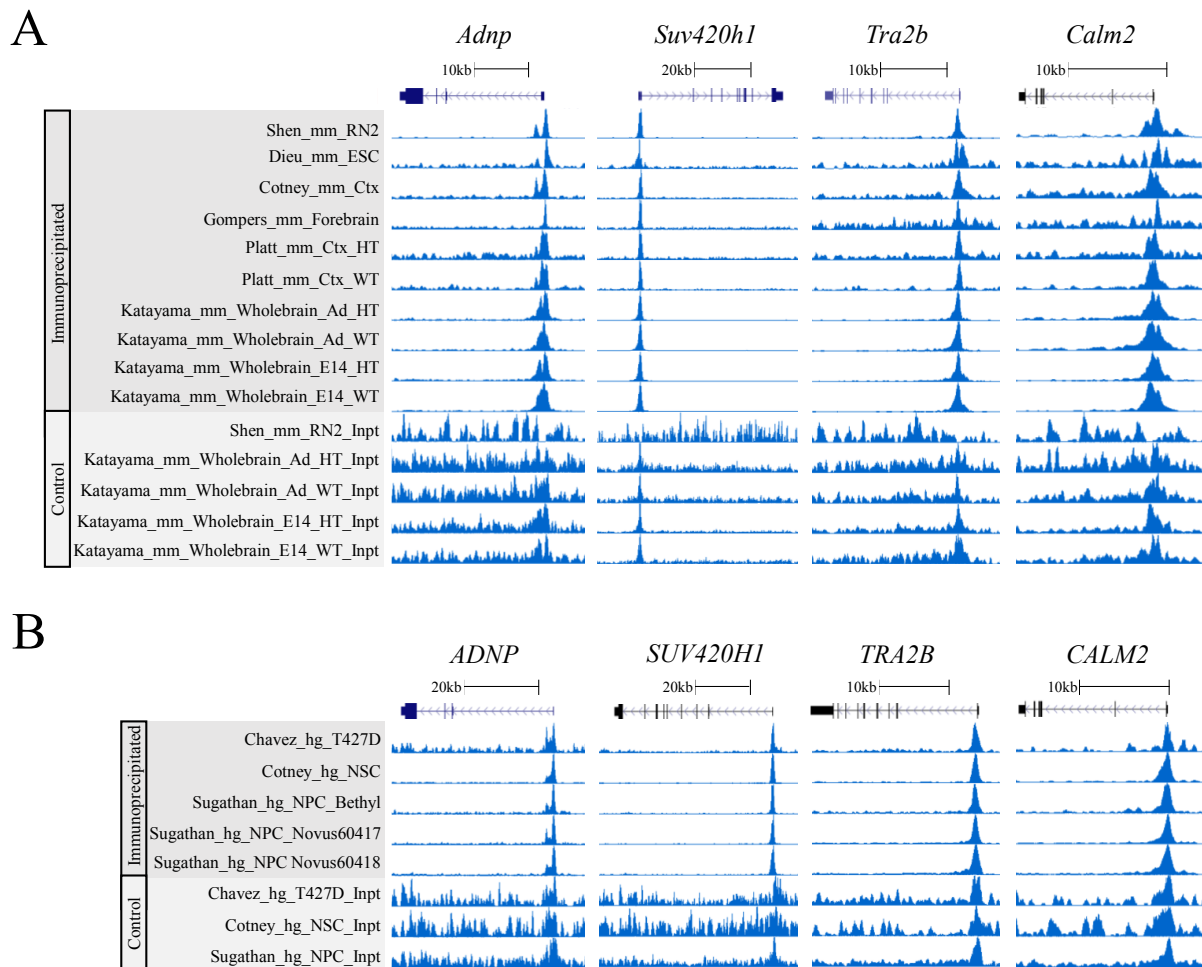

Examples of CHD8 binding near promoters of select chromatin (*ADNP*, *SUV420H1*), RNA processing (*TRA2B*), and neuronal function (*CALM2*) genes in the mouse (**top**) and human (**bottom**) ChIP-seq datasets.

Figure 5

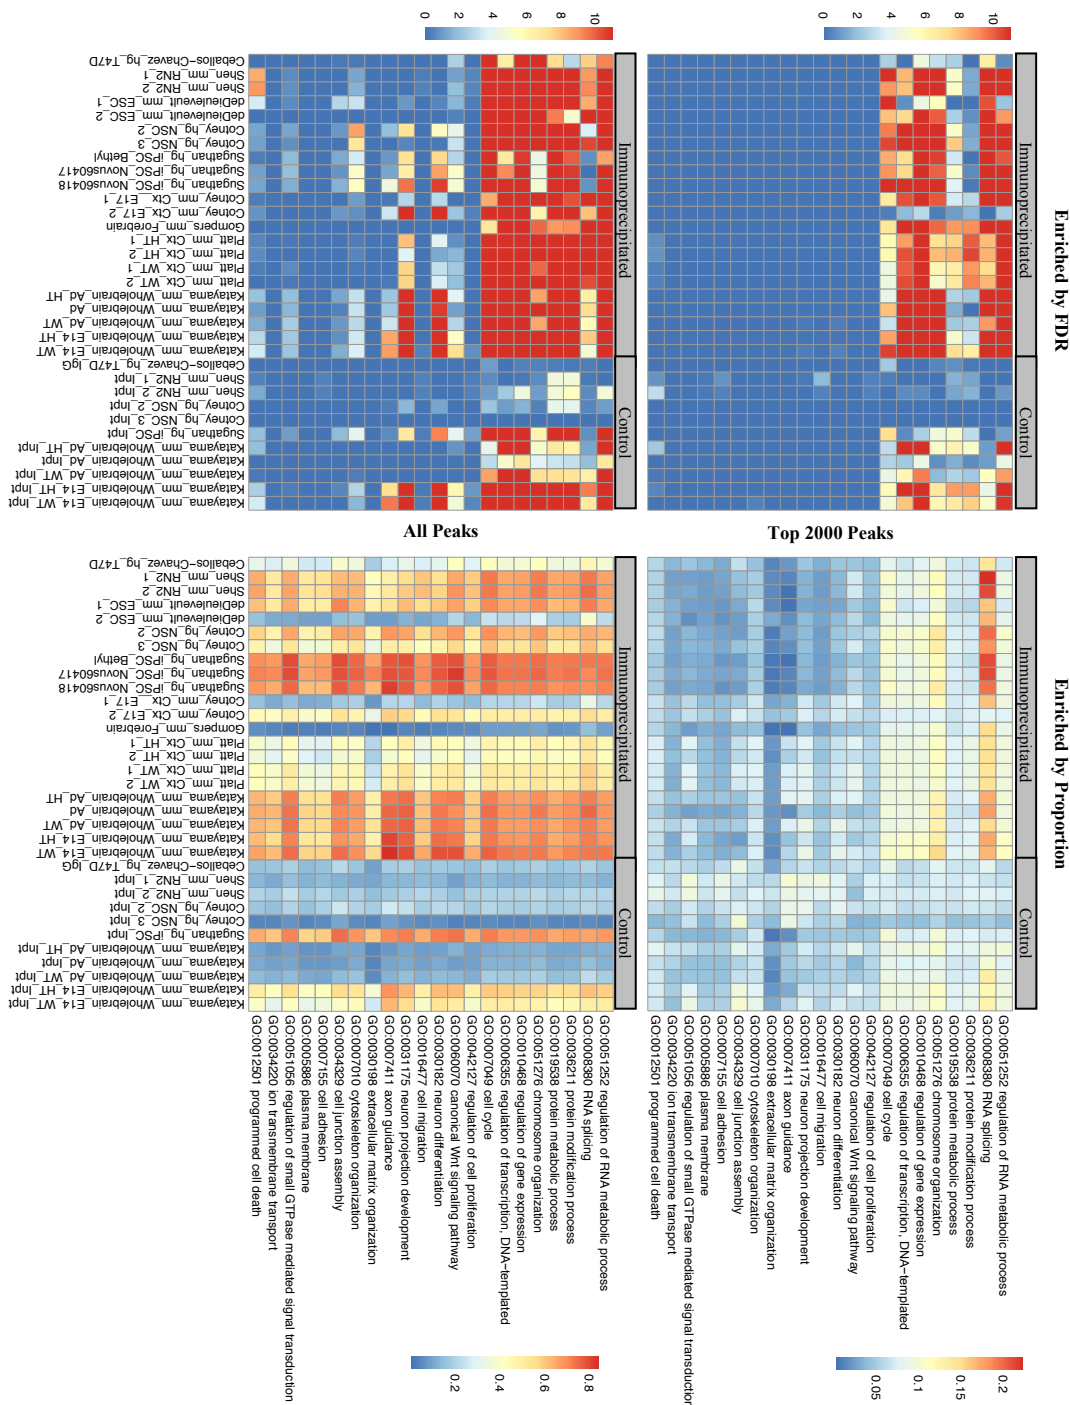

Unexplained specificity of CHD8 binding near gene regulator promoters. **(Left)** Enrichment of terms according to an FDR < 0.05 cutoff. **(Right)** Enrichment of terms according to proportion ranging from 0, not enriched, to 1, all genes in the term category. **(Top)** Analysis of the top 2000 significant peaks. **(Bottom)** Analysis of all peaks meeting a  $p < 0.00001$  MACS2 significance level.



Figure 6

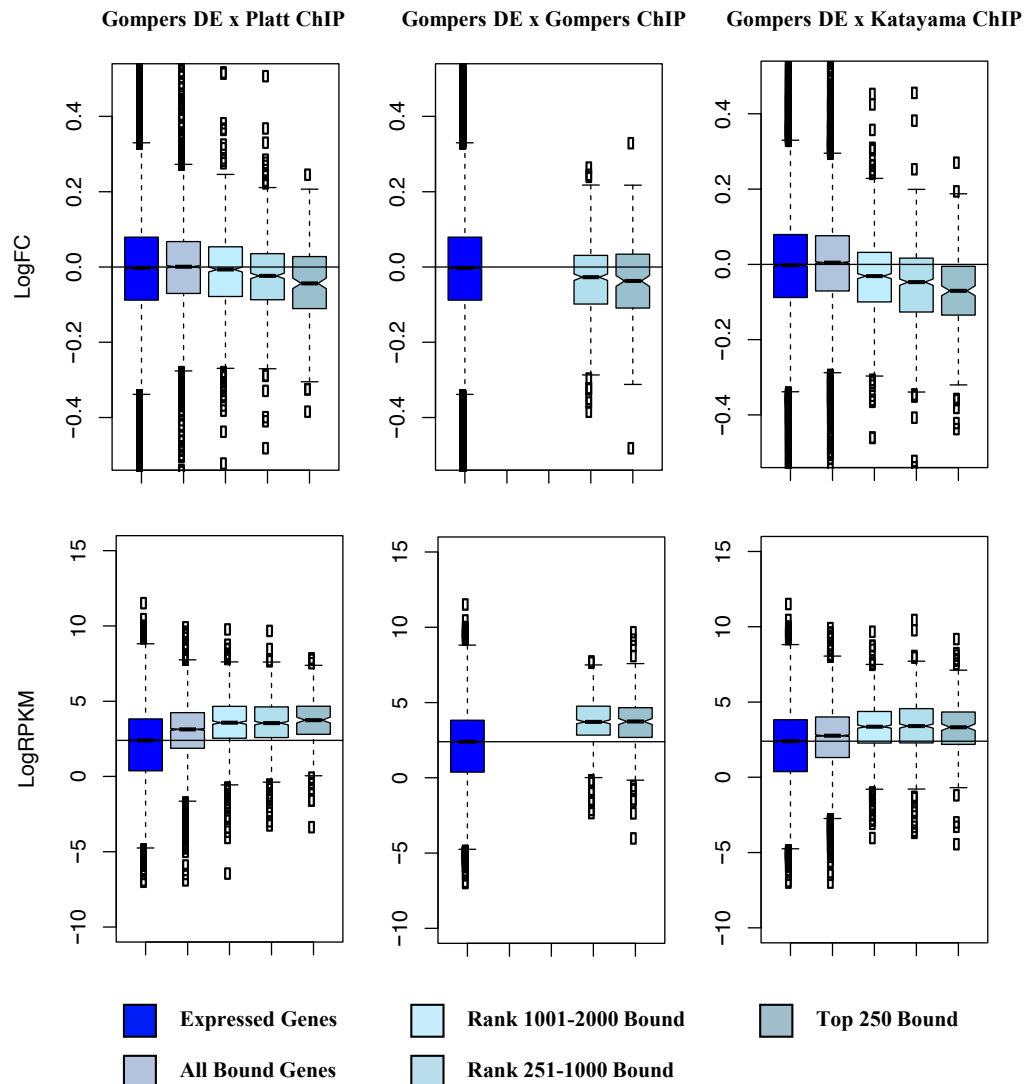

CHD8 regulates differentially expressed genes with high-confidence CHD8 binding. **(Left)** Comparison between the full Gompers et al. 2017 *Chd8* heterozygous mouse model differential expression gene set (DGE) and the Platt et al. 2017 *Chd8* ChIP-seq dataset. **(Middle)** Comparison between the Gompers et al. DGE and Gompers et al. *Chd8* ChIP-seq dataset. **(Right)** Comparison between the Gompers et al. DGE and Katayama et al. 2016 *Chd8* ChIP-seq dataset. **(Top)** Change in expression of genes according to CHD8 binding compared to wild-type littermates. **(Bottom)** Change in sequence coverage of genes according to CHD8 binding. Boxes were plotted according to CHD8 binding affinity bins: all genes meeting a 1 count per million sequencing coverage threshold included in DEG analysis (Expressed Genes), any genes having CHD8 binding (All Bound Genes), and all genes having binding ranked according to CHD8 peak significance (Top 250 Bound, Rank 251-1000 Bound, Rank 1001-2000 Bound).

Wade et al.

CHD8 Regulates Cellular Function Genes

Supplementary Figure 1

A

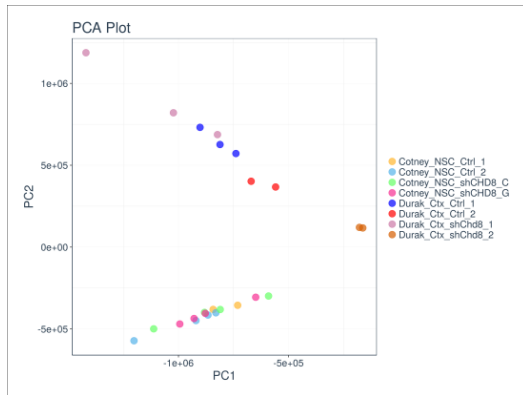

B

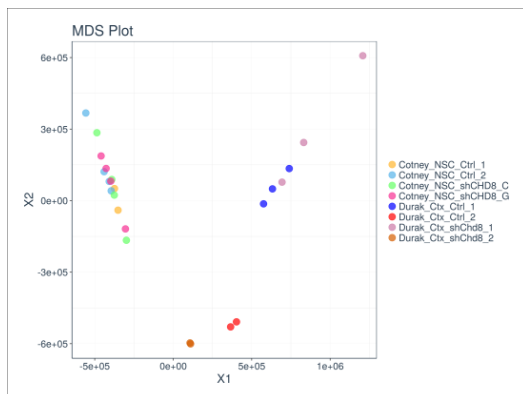

C

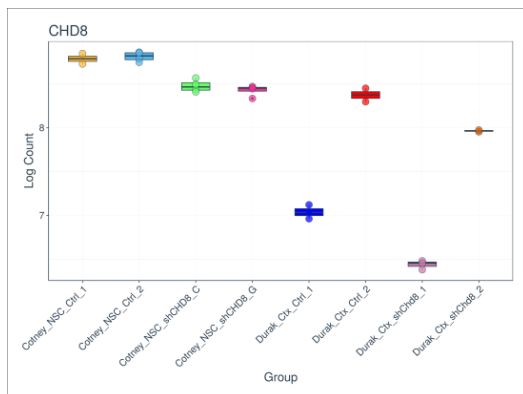

D

| Sample_ID         | X1                | X2                | Dataset        | Stage   | DPC |
|-------------------|-------------------|-------------------|----------------|---------|-----|
| SRR2187300        | 365714.383139047  | -529530.829404921 | Chd8_Durak_new | E14     | 14  |
| SRR2187301        | 403150.436175867  | -508433.447107675 | Chd8_Durak_new | E14     | 14  |
| SRR2187302        | 107085.512144799  | -596653.634584294 | Chd8_Durak_new | E14     | 14  |
| SRR2187303        | 110629.878929052  | -600821.693101648 | Chd8_Durak_new | E14     | 14  |
| SRR3742304        | 575604.716912612  | -13465.2614408446 | Chd8_Durak_new | E14     | 14  |
| SRR3742305        | 739354.156121881  | 134460.133941274  | Chd8_Durak_new | E14     | 14  |
| SRR3742306        | 632337.876971437  | 49225.7083557544  | Chd8_Durak_new | E14     | 14  |
| SRR3742307        | 831494.023354213  | 243780.152378351  | Chd8_Durak_new | E14     | 14  |
| SRR3742308        | 1207950.78288961  | 607695.148680997  | Chd8_Durak_new | E14     | 14  |
| SRR3742309        | 693329.543677461  | 77456.3832357758  | Chd8_Durak_new | E14     | 14  |
| SRR1273697_PAired | -374232.068456677 | 50560.16131895    | Chd8_Cotney    | Culture | 0   |

E

| gene    | SRR1273698_PAired | SRR1273710_PAired | SRR1273707_PAired | SRR1273703_PAired |
|---------|-------------------|-------------------|-------------------|-------------------|
| MT-CO1  | 331320            | 387375            | 424234            | 446886            |
| MT-RNR2 | 257094            | 196865            | 245120            | 246402            |
| ACTB    | 195067            | 296734            | 364682            | 441317            |
| MT-CO3  | 193414            | 208760            | 216081            | 228379            |
| EEF1A1  | 176858            | 174699            | 195045            | 236123            |
| MT-ND4  | 172429            | 188697            | 214128            | 229624            |
| MT-ND1  | 140895            | 150062            | 130451            | 137820            |
| MT-ND5  | 123117            | 146258            | 141660            | 156522            |
| MT-ATP6 | 121359            | 130648            | 118200            | 122287            |
| MT-CYB  | 119756            | 133506            | 136361            | 142841            |
| MT-CO2  | 112725            | 136036            | 134324            | 140293            |

F

| gene          | logFC            | logCPM           | LR               | PValue                 | FDR                    |
|---------------|------------------|------------------|------------------|------------------------|------------------------|
| Pknox1        | 10.1893909743101 | 2.7415176206258  | 78.2475579896002 | 9.09034027936509e-19   | 1.17192668881575e-14   |
| Scn7a         | 9.30992346782809 | 2.00367071273103 | 37.5212676199398 | 9.0421642606152e-10    | 0.00000194285969413085 |
| Adam28        | 9.069118111278   | 1.82235361349481 | 31.8552329365908 | 1.66101571861485e-8    | 0.0000267672683054784  |
| 9830132P13Rik | 8.52084082743699 | 1.44078411460925 | 26.5883646386537 | 2.5175537805942e-7     | 0.000231830738138718   |
| Adam34        | 8.44734793203072 | 1.39933105243928 | 21.3093834450535 | 0.00000390813800532776 | 0.00157449109889642    |
| Fgr           | 8.35245215369315 | 1.3353346094011  | 22.0394026582778 | 0.00000267110332614203 | 0.0013244563107932     |
| Mrgprb1       | 8.25985102308968 | 2.19287020514671 | 37.7619636655304 | 7.992504744468821e-10  | 0.00000194285969413085 |
| Gm9758        | 8.25487377588725 | 1.21752298804796 | 20.325191720521  | 0.00000653346909462387 | 0.00215973034789464    |
| Gata3         | 8.15429209802163 | 1.2050964464259  | 19.592212485207  | 0.00000958591260358926 | 0.00294241869727316    |
| Glib1l3       | 8.1183885651688  | 1.22679053991321 | 17.0340719865214 | 0.0000367150519858456  | 0.00695005146456275    |

Analyzing individual *CHD8* model gene expression and pairwise comparisons through the Shiny interactive web browser. (A) The *CHD8* RNA-seq Shiny app can generate a principle component analysis (PCA) scatter plot with any of the RNA-seq datasets loaded onto the app. You can tailor the plot according to several parameters including sample number, principle component, gene of interest, dataset, timepoint, sex, model organism, mouse or cell line, and genotype. This plot

shows the Cotney et al. 2015 and Durak et al. 2016 RNA-seq datasets plotted according to the experimental design, which is in this case the control and experimental constructs. A multidimensional scaling (MDS) plot (**B**) and log fold change differential gene expression bar plot (**C**) generated using Shiny is also shown with experimental design chosen as the display parameters. Almost all of the same display parameters for the PCA plot are available for the MDS and box plots. Supplementary tables showing metadata (**D**) and gene counts (**E**) are also available through the Shiny app. (**F**) Table showing log fold gene expression changes and significance values for individual genes between the Cotney et al. 2015 and Durak et al. 2016 RNA-seq datasets. Heat maps and scatter plots of gene expression changes are also available. All plots and tables generated using Shiny can be downloaded from the app. Datasets can be analyzed using pseudo counts or relative expression.

### Supplementary Figure 2

(See Supplementary Figure File)

Full list of terms from the gene ontology analysis using goseq. Terms were selected from this list to create Figure 2. All RNA-seq datasets were included in this figure. All terms included met an FDR < 0.05 cutoff.

Supplementary Figure 3

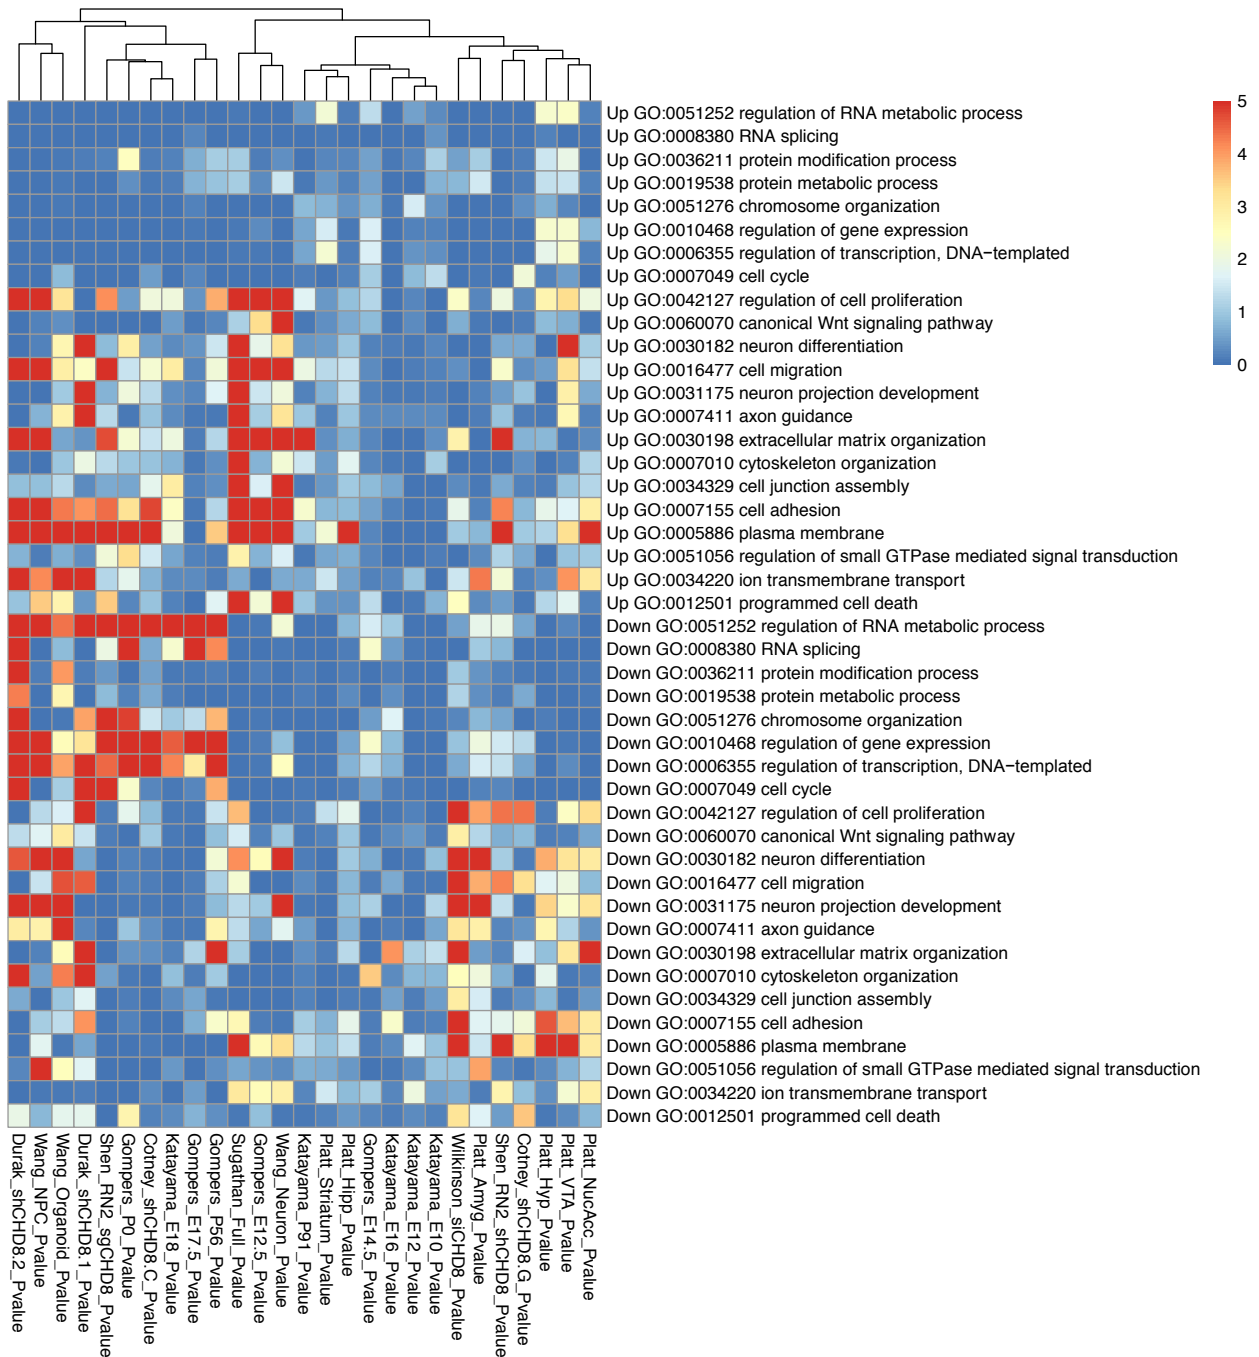

Enrichment of gene regulation and neurodevelopmental ontology terms meeting a goseq  $p < 0.05$  significance level in all Up- and Down-regulated datasets. **(Top)** Upregulated gene ontology enrichment. **(Bottom)** Downregulated gene ontology enrichment.

Supplementary Figure 4

|                     | ELF1<br> | ELK1<br> | E2F<br> | CTCF<br> | YY1<br> |
|---------------------|-------------------------------------------------------------------------------------------|-------------------------------------------------------------------------------------------|------------------------------------------------------------------------------------------|---------------------------------------------------------------------------------------------|--------------------------------------------------------------------------------------------|
| <b>Ceballos</b>     | ✓                                                                                         |                                                                                           | ✓                                                                                        |                                                                                             | ✓                                                                                          |
| <b>Cotney Hum</b>   |                                                                                           | ✓                                                                                         | ✓                                                                                        |                                                                                             |                                                                                            |
| <b>Sug. 60417</b>   |                                                                                           |                                                                                           | ✓                                                                                        |                                                                                             |                                                                                            |
| <b>Sug. 60418</b>   |                                                                                           |                                                                                           | ✓                                                                                        | ✓                                                                                           |                                                                                            |
| <b>Sug. Bethyl</b>  |                                                                                           |                                                                                           |                                                                                          | ✓                                                                                           |                                                                                            |
| <b>Gompers</b>      |                                                                                           |                                                                                           | ✓                                                                                        |                                                                                             |                                                                                            |
| <b>Platt HT</b>     | ✓                                                                                         | ✓                                                                                         |                                                                                          |                                                                                             | ✓                                                                                          |
| <b>Platt WT</b>     | ✓                                                                                         | ✓                                                                                         |                                                                                          |                                                                                             |                                                                                            |
| <b>Katayama Ad</b>  |                                                                                           |                                                                                           | ✓                                                                                        | ✓                                                                                           |                                                                                            |
| <b>Katayama E14</b> |                                                                                           |                                                                                           | ✓                                                                                        |                                                                                             | ✓                                                                                          |
| <b>De Dieu</b>      |                                                                                           | ✓                                                                                         |                                                                                          |                                                                                             | ✓                                                                                          |
| <b>Cotney Mouse</b> |                                                                                           |                                                                                           |                                                                                          | ✓                                                                                           | ✓                                                                                          |
| <b>Shen</b>         |                                                                                           |                                                                                           |                                                                                          | ✓                                                                                           | ✓                                                                                          |

No obvious primary motif associated with CHD8 binding. Each dataset was analyzed using HOMER to look for common motifs enriched in CHD8 ChIP-seq datasets. ELF1, ELK1, E2F, CTCF, and YY1 transcription factors were the motifs that were commonly represented across datasets. Ceballos – Ceballos-Chavez et al. 2015 ChIP-seq dataset, Sug. 60417, 60418, Bethyl – Sugathan et al. 2014 ChIP-seq datasets split according to antibody used (60417, NB100-60417; 60418, NB100-60418), Gompers – Gompers et al. 2017 ChIP-seq dataset, Platt HT, WT – Platt et al. 2017 ChIP-seq datasets split according to genotype of the samples (HT, heterozygous; WT, wild-type), Katayama – Katayama et al. 2016 ChIP-seq datasets split according to age of the samples (Ad, postnatal day 91; E14, embryonic day 14), De Dieu – De Dieulevult et al. 2016 ChIP-seq dataset, Cotney Hum, Mouse – Cotney et al. 2015 ChIP-seq datasets split according to model organism (Hum, human), Shen – Shen et al. 2015 ChIP-seq dataset.

Supplementary Figure 5

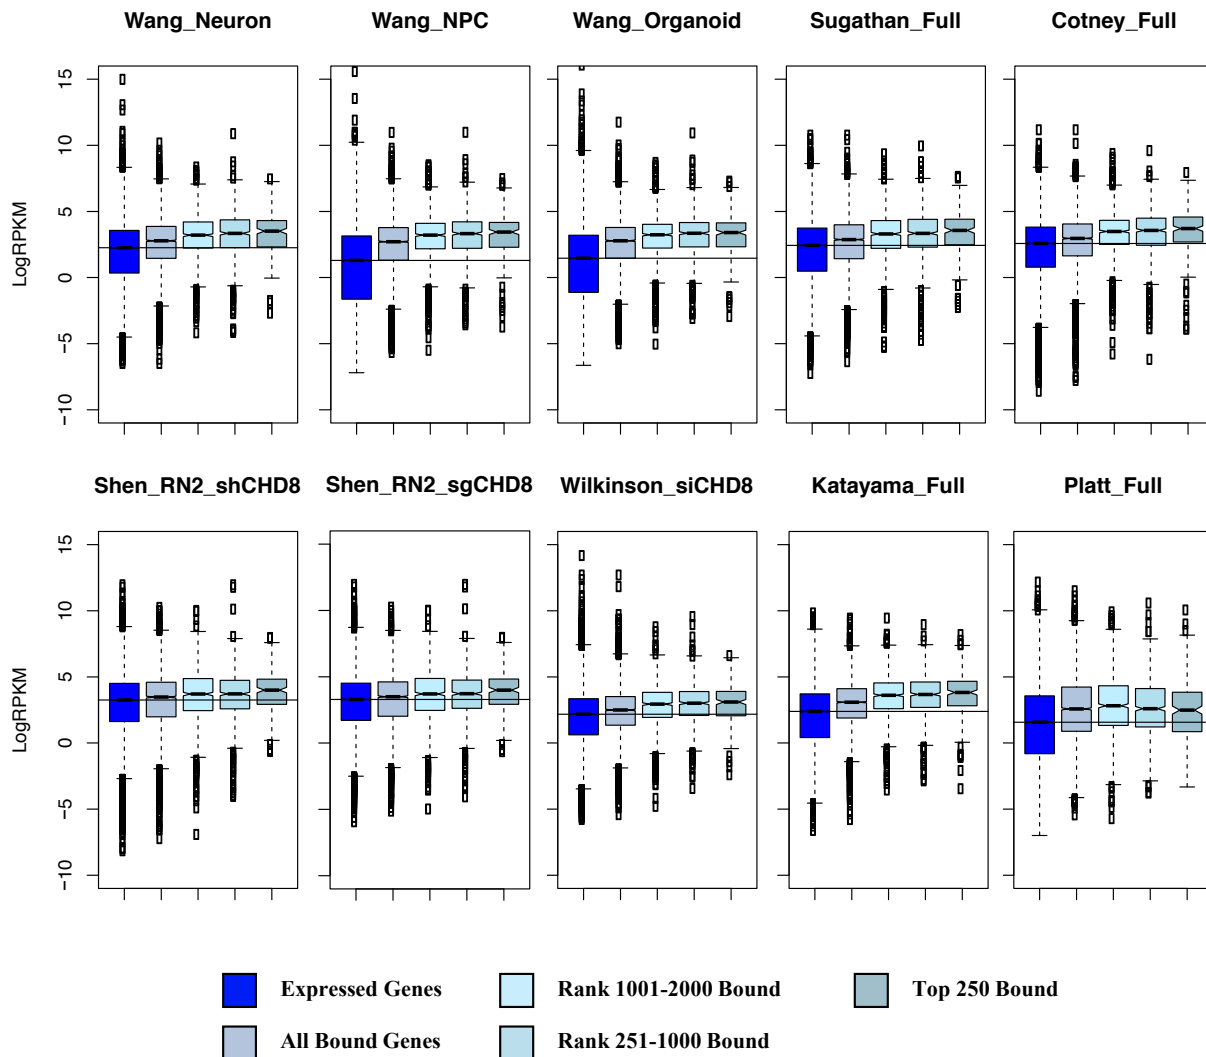

Chd8 regulates highly expressed genes. Each dataset is labelled showing changes in sequencing coverage according to changes in CHD8 binding affinity. The Chd8 ChIP-seq dataset used was from Platt et al. 2017. Full models for each dataset were chosen as they exhibited similar signal as the individual timepoint or brain region datasets.

Supplementary Figure 6

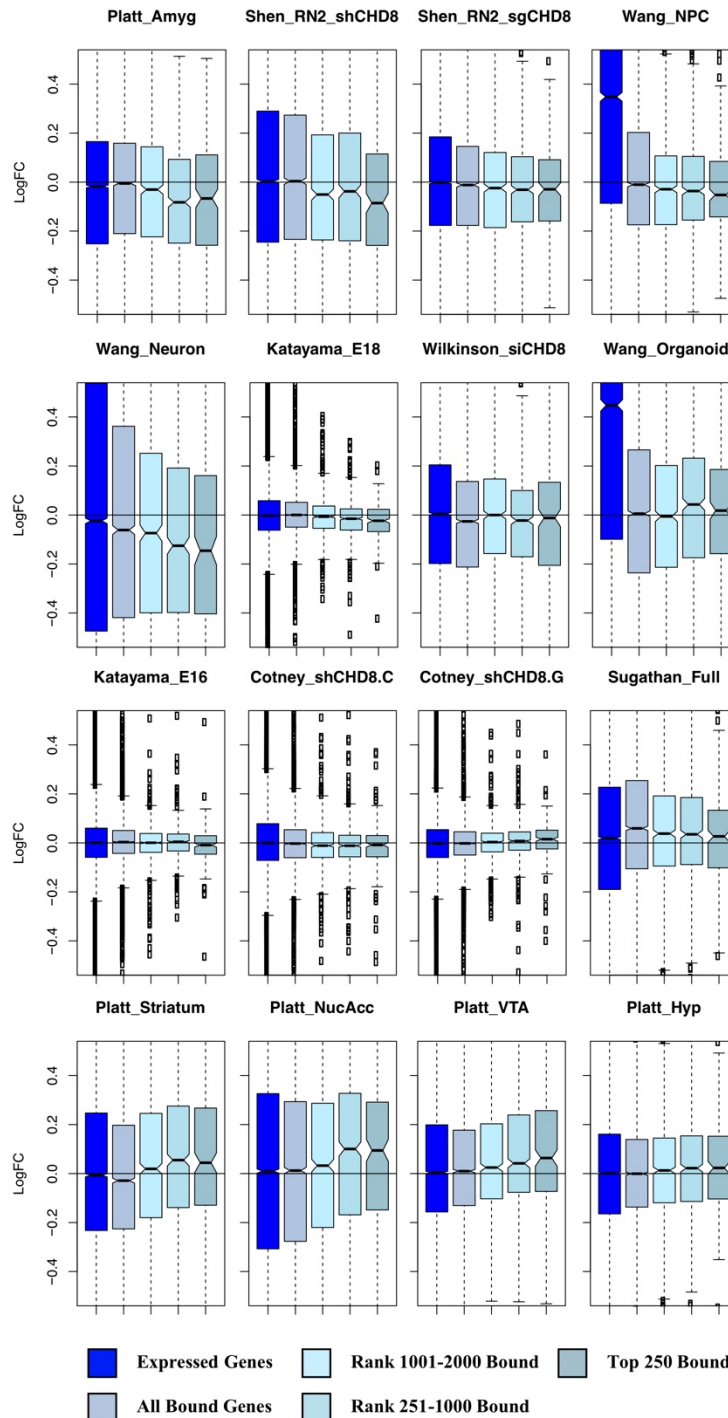

Remaining fold change plots from the CHD8 binding by differential gene expression comparison analysis. All datasets were analyzed using the Platt et al. 2017 Chd8 ChIP-seq dataset. Datasets are loosely organized based on overlap between downregulated genes, no clear trend, or upregulated genes from top to bottom, which sometimes spanned multiple rows.

Supplementary Figure 7

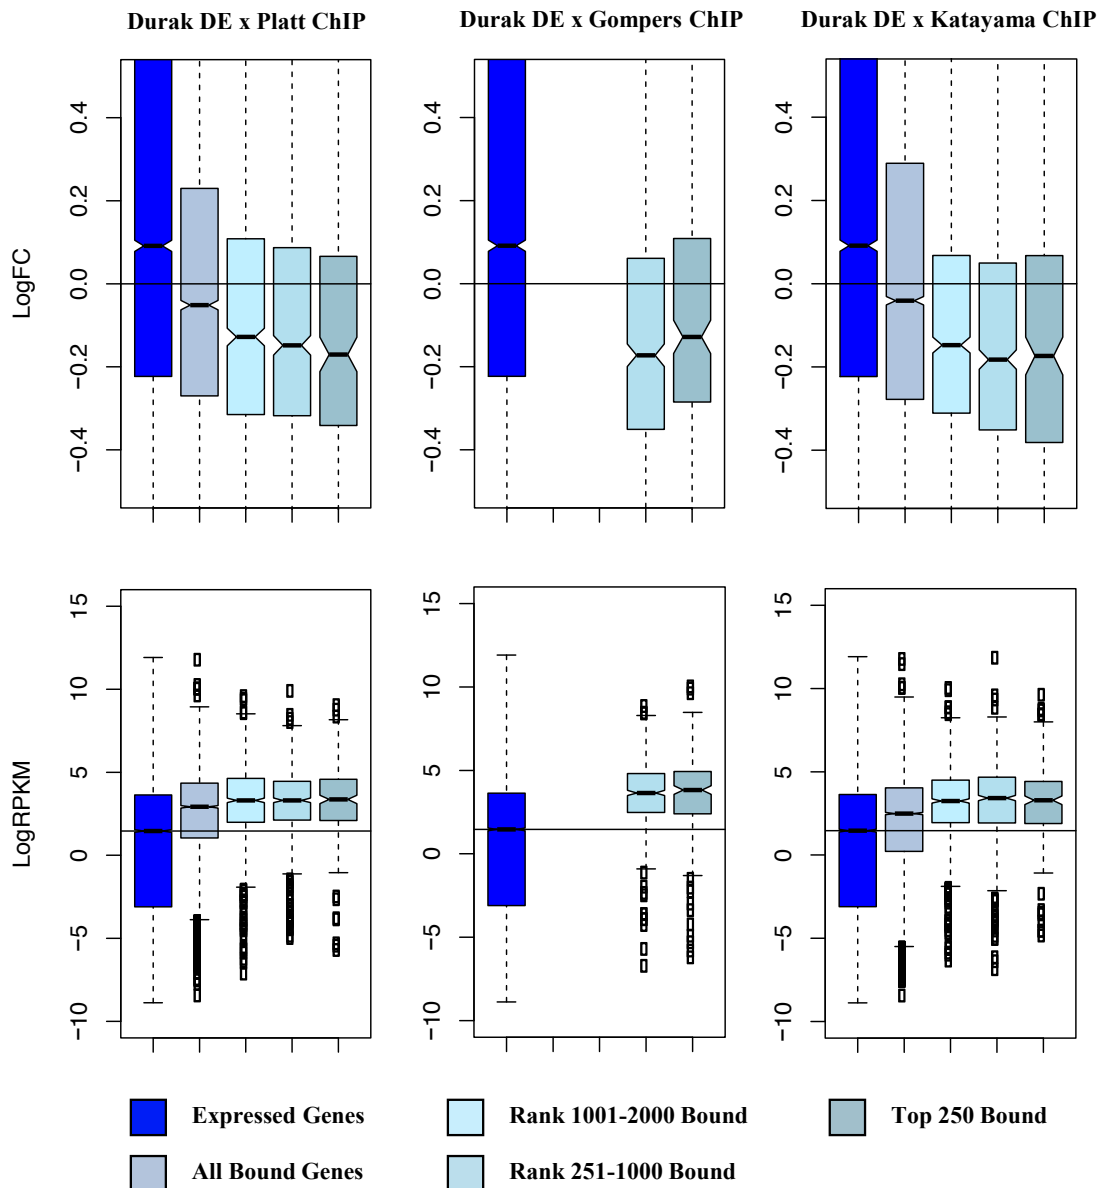

Chd8 regulates genes differentially expressed with *Chd8* knockdown. **(Left)** Comparison between the full Durak et al. 2016 *Chd8* knockdown mouse model differential expression gene set (DGE) and the Platt et al. 2017 *Chd8* ChIP-seq dataset. **(Middle)** Comparison between the Durak et al. DGE and Gompers et al. *Chd8* ChIP-seq dataset. **(Right)** Comparison between the Durak et al. DGE and Katayama et al. 2016 *Chd8* ChIP-seq dataset. **(Top)** Change in expression of all genes compared to wild-type littermates according to changes in CHD8 binding affinity. **(Bottom)** Changes in sequencing coverage of genes according to changes in CHD8 binding affinity.
